# Supplementary material
Source: PubMed Central journal article supplement (PMC7900932)
Supplement: jamapediatr-e206150-s001.pdf [file jamapediatr-e206150-s001.pdf]

Dipartimento Integrato Scienze Pediatriche ed Emato-Oncologiche

U.O.C. di Nefrologia

Laboratorio di Nefrologia Molecolare

Telefono +39-010-5636-3523 - GMarcoGhiggeri@gaslini.org

Funzionario Referente Dott. Gian Marco Ghiggeri

**PROTOCOL**  
**(Version N.2 February 8<sup>th</sup> 2019)**

**1) Title**

Efficacy of chimeric monoclonal anti-CD20 antibodies (Rituximab Biosimilar) in the treatment of childhood steroid-dependent nephrotic syndrome and development of cell biomarkers predicting outcome. The RTX 4 trial.

**2) Trial Registration**

Intended registry:

Eudact: 2018-001042-33

Protocol code: RTX4

**3) Protocol Version**

Version N. 2, February 8<sup>th</sup>, 2019

**4) Funding**

The Institute Giannina Gaslini (trial sponsor) will provide logistic and financial support to the trial through grants from the ministry of health ('Ricerca finalizzata- Italian researcher abroad' PE-2016-02361576).

**5) Roles and responsibilities**

**5a) Names, affiliations, and roles of protocol contributors:**

Dr. Gian Marco Ghiggeri MD; Division of Nephrology, Dialysis, Transplantation, Giannina Gaslini Children's Hospital, Via Gerolamo Gaslini 5, Genoa, 16148, Italy. Study concept and design.

Dr. Emma Francesco MD; Division of Nephrology and Urology, Ospedale Pediatrico Bambino Gesù, Roma. Study design, recruitment and clinical trials.

Dr. Francesca Lugani MD, PhD, Division of Nephrology, Dialysis, Transplantation, Giannina Gaslini Children's Hospital, Via Gerolamo Gaslini 5, Genoa, 16148, Italy. Recruitment, clinical trials, database.

Gianluca Caridi, PhD, Division of Nephrology, Dialysis, Transplantation, Giannina Gaslini Children's Hospital, Via Gerolamo Gaslini 5, Genoa, 16148, Italy. Methodologies, molecular and cellular studies.

Dr. Pietro Ravani, MD, PhD, Department of Medicine and Institute of Public Health, University of Calgary, Alberta, Canada. Study design, statistical analysis, randomization.

**5b) Name and contact information for the trial sponsor**

Name: Istituto Giannina Gaslini IRCCS, Scientific Direction

Contact: Via G. Gaslini 5, 16148 Genoa, Italy. Phone +39 010 56362461; email [direzionescientifica@gaslini](mailto:direzionescientifica@gaslini)

**5c) Role of study sponsor and funders, if any, in study design**

The study sponsor had no role in the study design and protocol development of this study. The sponsor will not have any role in the collection, analysis or interpretation of the data, or in the writing of report for publication. The researchers have complete independence from the sources of funding in all aspects of this study

---

**5d) Composition, roles, and responsibilities of the coordinating centre, steering committee, endpoint adjudication committee, data management team, and other individuals or groups overseeing the trial**

The steering committee includes the principal investigator (Gian Marco Ghiggeri), the Co-PI (Francesca Lugani) and Drs. Francesco Emma and Pietro Ravani, as well PhD Gianluca Caridi. External members will serve as data-safety and monitoring board (Giovanni Candiano PhD and Alba Carrea PhD and Antonella Trivelli MD with expertise in methodology and clinical management). We have appointed a blinded End-Point Adjudication Committee (EPAC) to ensure an ongoing review of all of the relevant data relating to each subject and to establish whether or not an end-point has occurred (Drs. Giorgio Piaggio and Enrico Verrina). The data manager is Francesca Lugani, MD, PhD.

**6) Introduction****6a) Background**

Idiopathic nephrotic syndrome (NS) is characterized by proteinuria and hypoalbuminemia associated with dyslipidemia and hypercoagulability. Oral corticosteroids are the cornerstone of therapy and induce disease remission in approximately 90% of cases (1). However, up to 85% of patients relapse and many develop steroid dependence (SDNS), requiring prolonged dose of steroids to maintain remission. Clinical practice guidelines (KDIGO) suggest using low-dose prednisone to maintain remission in SDNS (ev. 2C-D) and Mycophenolate Mofetil (MMF) or calcineurin inhibitors (CNI) as corticosteroid-sparing agents for children who develop steroid adverse effects (ev.1B)(1). Given the toxicity of all these drugs (steroids, CNI and MMF), there is a need to investigate alternative options. Recent evidence support the use of chimeric anti-CD20 monoclonal antibodies in simple SDNS (2) and in patients dependent to a multi-drug approach (3-4). Between 2013 and 2015 we carried out a randomized clinical trial comparing the efficacy of RTX with the new humanized anti-CD20 antibodies Ofatumumab (OFA2) (5). At that time, OFA was in phase III clinical trials for the treatment of chronic lymphocytic leukemia and for rheumatic disorders (6-7) and it was under evaluation in severe forms of NS unresponsive to drugs (OFA1) (8-9). Both OFA1 and OFA2 failed to prove superiority of Ofatumumab over RTX in both SDNS and in resistant forms (personal observation, see Fig 1). In the meantime, consolidated results on 400 treatments also showed comparable side-effect profiles of both drugs (10). Finally, starting from June 2018, a new biosimilar RTX is available reducing by 50% the economic balance of the treatment.

**6b) Rationale**

Nephrotic syndrome is considered a disease caused by an interplay of immunological stimuli with adaptive immunity (CD80/CD40) as trigger and Treg in the mid between co-stimulatory molecules and effectors (11). Blocking CD20 maturation is also beneficial in patients with NS suggesting a main role of these cells in regulating the system (12). In the last five years, the anti-CD20 mAb Rituximab has emerged as an effective therapy for idiopathic NS especially in children (8), first for the treatment of difficult cases, i.e. as steroid sparing drug in children with a multidrug dependence(2,3) and only recently in patients with simple steroid dependence (4). When used early in the course of SDNS (in children maintained in remission with high-dose steroids alone), a single infusion of Rituximab allows remission off-therapy for one year in 80% of cases (8).

In 2015, a new anti-CD20 mAb (Ofatumumab, OFA) has been licensed for human use. It is a completely humanized antibody that was supposed to be more effective in treating NS than RTX and also to reduce the risk of infusion reactions. This drug was proposed also to treat forms of NS resistant to Rituximab (8). Contrary to any expectation, RTX was not inferior to OFA in treating multidrug-dependent (personal observations) and resistant NS (9) nor the later showed a limited side-effect profile to justify its use in clinical settings (see below). Therefore, the objective is now to discover whether RTX is better than, the MMF benchmark proposed by KDIGO, and also to seek for less expensive formulation of RTX now available as biosimilars of the original formula. **Preliminary data:**

Our current proposal is based on most recent progress showing non inferiority of RTX versus OFA in treating NS. Actually, the humanized anti-CD20 mAb OFA was developed based on the idea that the chimeric structure of RTX may limit its efficacy. Two randomized controlled phase 2 trials in patients with rheumatoid arthritis non responsive to methotrexate showed safety of OFA and demonstrated clinical benefits only utilizing doses of OFA double than RTX (1,500 vs 650 mg 1,73 m2) (6,7). Recent results in two small series of children with steroid resistance who did not respond to Rituximab therapy indicated that the new anti-CD20 OFA may induce disease remission (9,10) but the beneficial effect seems to be limited to patients with normal renal function and it is dose-dependent (10). The advantage, in this case, was obtained when OFA was given in very high amount (i.e. 8 gr in 4 administrations) that represent 12 times the median dose of RTX. We considered that these doses are too high and go behind the safety profile of the drug (10). Based on these concerns, two randomized clinical trials (OFA1 and OFA2) have been designed in 2015 at our Institutions (Clinical Trials.gov NCT02394119 and NCT02394106), one comparing RTX and OFA in multidrug dependent NS and the other seeking on a blind basis and effect of OFA at the usual dose of 1,500 mg 1,73 m2 versus placebo in more severe forms of NS resistant to all drugs. The results clearly indicate no superiority of OFA in the former case (OFA2) and the second failed to show improvement of proteinuria (see attachment 2).

A second important evolution reached in 2018 was the demonstration, obtained after having performed 400 treatments, that the safety profile of RTX and OFA are similar (10) meaning that the humanized structure does not determine any significant clinical advantage as concerns side effects.

Finally, some of us have investigated B cell subset reconstitution following Rituximab and have identified reappearance of memory B cells as an early accurate predictor of relapse In this application we propose the RTX4 trial to compare the efficacy of biosimilar RTX vs. MMF in patients with SDNS. The analysis of lymphocyte subset reconstitution following anti-CD20 infusion and the identification of predictors of clinical outcome are two ancillary aims of the project.

Fig 1 to support preliminary data

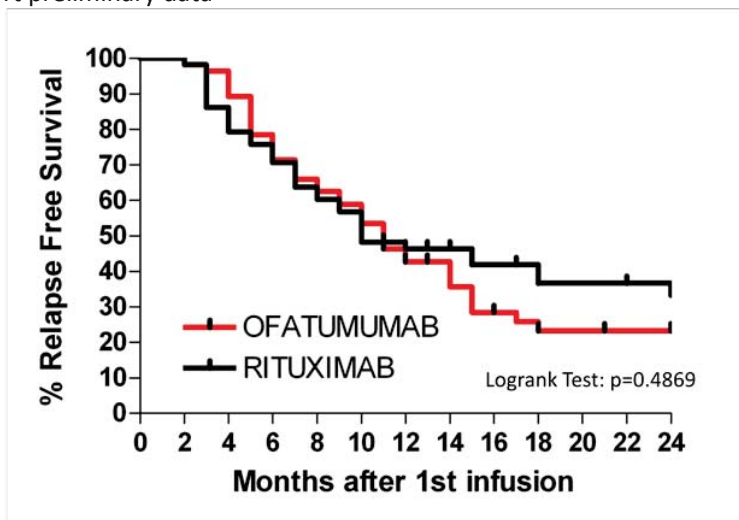

**Figure 1.** Kaplan Meir analysis comparing the outcome in respect of proteinuria, of 140 children affected by multidrug dependent nephrotic syndrome and randomized to OFA or RTX treatments. On the y axis it is reported the percent of pts still in relapse, the time in months it is reported on the x axis. RTX was given e.v. at 375 mg m2, OFA was given at 1,500 mg 1,73 m2.

### **6c) Expected benefits**

Nephrotic syndrome dependent on steroids has been historically treated with MMF and/or with CNI. In last few years, we introduced the anti-CD20 mAb Rituximab and obtained remission for 12-24 months following a single infusion (8). However, more infusions may be necessary in more complex children. Biosimilar RTX has been recently made available and represents a potential candidate for treating patients presenting dependence to drugs. Ofatumumab is easy to handle, has resolvable side effects at infusion and may have advantages over classical MMF and CNI in terms of long-term side effects (i.e. gastro-intestinal for MMF and nephrotoxicity for CNI). Innovation is considerable also in consideration that RTX is infused once a year and does not require a daily administration which reduces compliance in the long-term.

Finally, costs should be remarkably reduced. If we compare one infusion of RTX per year versus one year of daily MMF the costs are 1280 €/year (full price) for RTX and 1800 €/year for MMF.

### **7) Aims:**

#### **7a) Specific Aim 1:**

Primary: to test whether Rituximab is able to achieve and maintain drug-free disease remission in patients with steroid-dependent nephrotic syndrome at 12 months. This outcome will be compared to MMF, the drug recommended by Clinical Practice Guidelines (KDIGO) as benchmark of the treatment. The objective of the proposal is therefore to test whether Rituximab is superior to MMF in maintaining oral drug-free disease remission (complete or partial remission) for 12 months in patients with SDNS.

Secondary: to reduce the risk of relapse in a longer follow-up of 24 months in the same group of patients.

Tertiary: to compare the economic balance between biosimilar RTX and MMF.

#### **7b) Specific Aim 2:**

To confirm a low clinical the occurrence of side-effects in the short (30 days), mid (90 days) and long-term periods (2 years).

#### **7c) Specific Aim 3:**

To analyze B and T cell lymphocyte subsets pre and post-therapy with Rituximab in order to study reconstitution of immune competence in these patients versus patients treated with MMF and to identify biomarkers of response to Rituximab and predictors of disease relapse.

### **8) Experimental Design**

#### **8a) Experimental Aim 1:**

The RTX4 trial is an open-label, two-parallel-arm, controlled and randomized clinical trial testing the superiority of RTX over MMF in maintaining steroid free disease remission in patients with SDNS. Eligible participants are children and young adults (age between 3 and 24 years) with nephrotic syndrome who are dependent on prednisone 0.3-1mg/Kg/day and have received prednisone for at least six months before enrolment. Previous treatment with MMF will be allowed. All participants will enter a 45 days run-in period, during which children treated with steroids alone will start MMF 1,200 mg/1,73 sqm orally in 2 daily doses and will taper steroids after 15 days by 0.3 mg/kg per week until complete withdrawal. Patients already receiving MMF alone will continue the treatment. During the same period, instruction on urine collection and dipstick readings will be carefully reviewed and compliance assessed. After run-in period, children will be randomized to either the intervention arm (Rituximab, 375mg/m<sup>2</sup>) or the comparator arm (continuing or starting MMF). In the intervention arm, 1 month after infusion MMF will be decreased by 50% and withdrawn within 2 additional weeks, whereas MMF will be maintained in the comparator. All patients will be followed for up to 24 months. In case of relapses during this period (see outcome section for definition) patients will be treated with oral prednisone (60 mg/sqm day). Following remission, steroids will be maintained at the initial dose for 7 days and then tapered off by 0.3 mg/kg per week until complete withdrawal in patients of the MMF arm. Patients of the intervention arm will instead be treated with another infusion of RTX (same dose) immediately following steroid-induced remission. After infusion of

RTX, steroids will be maintained at the initial dose for 7 days and then tapered off by 0.3 mg/kg per week until complete withdrawal. In this way relapsed patients in both arms will receive the same cumulative dose of prednisone. In case following relapse of proteinuria patients fail to respond to prednisone (they will terminate the study and be considered as treatment failure). The study allows drop-in from one arm to the other after 3 relapses (i.e., investigators will be allowed to use RTX in the comparator arm and vice versa MMF in intervention arm). The economic balance will be calculated on the basis of RTX doses needed to maintain remittance.

**8b) Experimental Aim 2:**

Participants will be randomized in a 1:1 ratio to the comparator or the intervention arm. A distant site, with no clinical involvement in the trial will generate the randomization list using permuted blocks of size 2, 4, and 6. Assignments will be stratified by age at recruitment  $\geq 9$  years vs.  $< 9$  years). This choice is motivated by the need to maximize the likelihood of balancing factors potentially affecting the effects of the intervention on outcomes, which are associated with age (disease duration, age at onset, relapse history and disease severity). Assignments will be notified electronically after obtaining signed consent (and assent for participants capable of assenting). The staff members responsible for recruitment will request randomization. Each patient will be given a unique study number, sent by email to the staff member requiring randomization. One of the project leaders not involved in patient care (dr. P. Ravani) is responsible for generation of the randomization lists and communication of the assignments.

**8c) Experimental Aim 3:**

Mononuclear cells (PBMCs) will be characterized by flow cytometry according to the following cell panels: Panel 1- CD3 PerCP-Cy5.5, CD4 BV421, CD8 BV510, CD56PE, TCR gamma-delta FITC, CD161 APC for the quantification of CD3, CD4, CD8, NK and gamma-delta subpopulations; Panel 2 for Tregs: CD4 BV421, CD25 PE, CD127 FITC, CD39; Panel 3 for B cells: CD19 PE-Cy7, CD20 FITC, CD80 PE, CD86 APC; Panel 4 for memory B cells: CD19Cychrome, CD24 PE, CD38 PE-Cy7, CD27 FITC, IgM-APC, IgD-APC-Cy7. Samples for cell analysis will be obtained at the start of run-in (-45 days), at time 0 and after 3, 12 and 24 months; the same analysis will be performed in case of relapse. In parallel, total IgG, IgA and IgM levels will be assessed to evaluate the effect of B cell depletion on antibody production.

**9) Methodologies and statistical analysis:**

Interventions will be administered during an in-patient setting at the Nephrology Units of the Giannina Gaslini Children's Hospital, Genoa and Bambin Gesù Hospital, Rome. Follow up visits will be performed at the nephrology outpatient clinics of Giannina Gaslini Children's Hospital and Bambin Gesù Hospital or, in case of impossibility to reach these centres, by another nephrologist identified on the basis of geographical reason.

Cell studies: Mononuclear cells (PBMCs) will be obtained from EDTA-peripheral blood by density centrifugation using Histopaque 1077; immunofluorescence and flow cytometry will be performed by accepted techniques using BD Fortessa Instrument equipped with Kaluza Software (Beckman Coulter).

Power analysis: we estimated that a sample of 160 participants (80 assigned to RTX and 80 to MMF) will have a power of 80% to detect as significant at the two-sided p value of 0.05 a reduction in the risk of relapse at two years from 0.5 to 0.25 (hazard ratio 0.5). We made these calculations assuming a rate of withdrawal of 5% (which overestimates what we found in our previous studies). Statistical analysis: We will use standard methods to describe sample characteristics by randomized intervention, using mean and standard deviation, median and range, and frequencies as appropriate. We will describe and compare survival times from randomization (time zero) to event occurrence (relapse) using the Kaplan-Meier method and log-rank test; we will estimate the hazard ratio using Cox regression. Consistent with the sample size estimation based on independent proportions, we will use logistic regression for primary outcome comparison (risk of relapse at 24 months). We will use parametric survival models to estimate the average time to relapse considering repeated events over follow-up as we have done in the past.



## **10) Eligibility criteria:**

### **Inclusion criteria:**

To be eligible for inclusion into this study, participants will have to fulfil the following criteria:

- Age between 3 and 24 years
- Prednisone dependent steroid syndrome 0.3-1mg/Kg/day and receive prednisone for at least six months before enrolment. Steroid dependence is defined by two consecutive relapse during corticosteroid therapy or within 14 days of ceasing therapy.
- Ability to provide consent and assent: parents'/guardian's written informed consent, and child's assent given before any study-related procedure not part of the subject's normal medical care, with the understanding that consent may be withdrawn by the subject any time without prejudice to his or her future medical care.

### **Exclusion criteria:**

Children will be excluded if any of the following criteria apply:

- Positivity to autoimmunity tests (ANA, nDNA, ANCA)
- Reduction of C3 levels.
- eGFR<90/ml/min/1,73 m<sup>2</sup> valuated according to revised Bedside Schwartz Formula for patients between 2 and 17 years and with CKD-EPI Creatinine 2009 Equation for 18 years old patients.
- Pregnancy
- Neoplasm
- Infections: previous or actual HBV (with HBeAb positivity) or HCV infection
- CD20 B lymphocytes count <2,5%
- Treatment with Rituximab or cyclophosphamide in the last 6 months

## **11) Interventions**

### **11a) Interventions for each group**

#### **Active Intervention and cointervention**

- Drug Name: Rituximab biosimilar monoclonal anti-CD20 antibody
- Why: Anti-body/antigen interaction results in cell apoptosis and reduced CD20 positive cell related activities (of note CD20 is mostly represented on B cells but also in Th17 cells)
- Materials: oral cetirizine, IV methylprednisolone, oral paracetamol prior to RTX infusion – to reduce common reactions; RTX IV infusion.
- Procedures: methylprednisolone 2 mg/kg infused in 30' IV diluted in 100 ml of normal saline (NaCl 0,9%); oral paracetamol 15 mg/kg ; oral cetirizine 0,2 mg/kg prior to RTX infusion.
- Who provides: Gaslini Institute
- Who delivers: registered nurse
- How: RTX IV : for dosage between 100 and 250 mg Rituximab will be diluted in 100 ml of normal saline and administered at 2 ml/h for the first 30'; 3 ml/h for the second 30'; 6 ml/h for the third 30'; 15 ml/h until the end. For dosage between 260 and 500 mg Rituximab will be diluted in 250 ml of normal saline and administered at 6 ml/h for the first 30'; 9 ml/h for the second 30'; 18 ml/h for the third 30'; 36 ml/h until the end. For dosage between 510 and 1000 mg Rituximab will be diluted in 500 ml of normal saline and administered at 9 ml/h for the first 30'; thereafter, the infusion rate can be doubled every 30 minutes up to a maximum of 72 ml/h.
- Where: in Hospital
- When and how much: once; diluted in 1000 ml of normal saline.
- Tailoring: 375 mgm<sup>2</sup>
- How well: expert nurse would assist administration

**Comparator**

-Drug Name: Mycophenolate Mofetil (MMF)

-Why: selective and reversible inhibition of inosine monophosphate dehydrogenase with inhibition that particularly affects lymphocytes since they rely almost exclusively de novo purine synthesis

-Materials: MMF

-Procedures: MMF 1,200 mg/1,73 sqm orally divided in 2 daily doses

**11b) Criteria for discontinuing or modifying allocated interventions for a given trial participant**

The Investigator may withdraw a participant from the study at any time if this is considered to be in the subject's best interest.

Withdrawal is mandatory in the following situations:

- Serious hypersensitivity or allergic reaction during infusion.

- Investigator's or child's or parents'/legal tutor's request.

**11c) Strategies to improve adherence to intervention protocols, and any procedures for monitoring adherence**

RTX will be administered during hospitalization the protocol and does not provide strategies to improve adherence to therapy.

**11d) Relevant concomitant care and interventions that are permitted or prohibited during the trial**

Any medications other than those excluded by the protocol, that are considered necessary for the subject and will not interfere with the study medication, may be given at the discretion of the Investigator.

The Investigator will record all concomitant medications taken by the subject during the study from the date of signature of informed consent, in the appropriate section of the CRF.

**12) Expected outcomes:**

The first expected result of the project is the demonstration that a single infusion of RTX is more likely than MMF to maintain remission of NS for 12-24 months in children with primary SDNS. A second result of the study will be based on the side-effects that RTX may induce, that we expect to be of low clinical impact. A third expected result is the identification of biomarkers of response to RTX and evaluation of immune competence in patients treated with RTX vs. patients treated with MMF. Taken together, these results should move us forward in obtaining a personalized approach to the treatment of SDNS identifying the optimal children to treat with anti-CD20 mAb.

**13) Risk analysis, possible problems and solutions:**

There are potential clinical risks linked with the infusion of RTX. Although side effects have been already described, in most cases they resolved with minimal interventions (11). Other concerns may include the feasibility of multi-center collaboration. However, Genoa and Rome have a track record of previous networking, including in clinical trials. We consider that this network would allow an easy recruitment of 160 patients in two years, considering an estimate of 125-150/year new diagnoses of idiopathic NS in Italy and almost 1200-1500 prevalent cases. The two units of the study (Genoa and Rome) are the major referral centers in Italy for this clinical condition.

**14) Participant timeline**

See last page for time schedule of enrolment, interventions assessments, and visits for participants (Table 1).

**15) Subjects completion or withdrawal**

Subjects will be informed that they have the right to withdraw from the study at any time, without prejudice to their medical care, and that they are not obliged to state their reasons. Any withdrawal must be fully documented in the CRF and source documents, and should be followed up by the Investigator.

A subject will be considered a “completer” when she/he has completed all study procedures and assessments up to the Month-12 visit (primary endpoint) and Moth-24 visit (secondary endpoint).

The Investigator may withdraw a subject at any time if this is considered to be in the subject’s best interest. Withdrawal is mandatory in the following situations:

- Pregnancy.
- Significant worsening of renal function.
- Onset of malignancy.
- Serious hypersensitivity or allergic reaction.
- Any other serious adverse event.
- Serious intercurrent illness.
- Administrative reasons, or
- Investigator’s or subject’s or parents’/legal tutor’s request.

#### **16)Methods: Assignment of interventions**

Participants will be randomized in a 1:1 ratio to the comparator or the intervention arm.

A distant site with no clinical involvement in the trial will generate the randomization list using permuted blocks of size 2, 4, and 6. Assignments will be stratified by age at recruitment  $\geq 9$  years vs.  $< 9$  years). This choice is motivated by the need to maximize the likelihood of balancing factors potentially affecting the effects of the intervention on outcomes, which are associated with age (disease duration, age at onset, relapse history and disease severity).

Assignments will be notified electronically after obtaining signed consent (and assent for participants capable of assenting). One of the project leads not involved in patient care (Dr. P. Ravani) will generate the randomization lists.

#### **17)Methods: Data collection, management, and analysis**

##### **17a) Data collection methods**

##### **17a.1) Plans for assessment and collection of outcome, baseline, and other trial data**

Study visits will occur at baseline, after 1 month and every three/six months thereafter, unless complications or relapses will occur. Determination of 24 hours proteinuria at baseline and after 6, 12 and 24 months will be performed at a central laboratory (in order to assess the primary and secondary outcome). Dipstick for proteinuria determination will be evaluated daily. In case of dipstick positivity, the presence of proteinuria will be confirmed with 24-hour urine collection.

Complete blood count, kidney function, plasma proteins, immunoglobulins lipid status (cholesterol and triglycerides), albumin and lymphocyte subpopulations (for CD 20 lymphocytes B count) will be obtained at 1, 3, 6, 12, 18 and 24 months during protocol visits.

##### **17a.2) Plans to promote participant retention and complete follow-up**

Study coordinators will maintain on-going contact with the children, their families, and the family physician to collect clinical data including blood pressure and potential adverse events

##### **17a.3) Data management**

The Investigator or designee will be responsible for recording study data in the paper CRF and entering study data in the electronic (e-)CRF prepared by the study coordinating centre. It is the Investigator’s responsibility to ensure the accuracy of the data entered in the paper/e-CRFs.

The data will be entered into a validated database. Coordinating center data management at the G. Gaslini Institute, Genoa, will be responsible for data processing, in accordance with G. Gaslini’s data management procedures. Database lock will occur once quality assurance procedures have been completed.

##### **17b) Statistical methods**

**17b.1) Statistical methods for analysing primary and secondary outcomes** We will use standard statistical methods to summarize the sample characteristics overall and by arm assignment, using statistics for



quantitative and qualitative data as appropriate. We will use logistic regression to compare the risk of relapse at 12 months with a two-sided P value of <0.05 as level of statistical significance.

**17b.2) Methods for any additional analyses**

We will repeat the comparison at 6 months. We will use survival methods that we applied already in studies of SDNS (Ravani et al. Rituximab is a safe and effective long-term treatment for children with steroid and calcineurin inhibitor-dependent idiopathic nephrotic syndrome. *Kidney Int* 2013; 84:1025-33) to assess the risk of repeated relapses and estimate the average time to relapse by treatment group.

**17b.3) Definition of analysis population relating to protocol non-adherence and any statistical methods to handle missing data**

We will use an intention-to-treat approach, whereby participants will be analysed as randomized regardless of protocol adherence. Missing data will be replaced in a way that reflects the worse case scenario: missing data in the placebo group will be defined as success and missing data in the active intervention will be unsuccessful.

**18) Methods: Monitoring**

**18a) Composition of data monitoring committee**

An independent data and safety monitoring board will review safety data once half the participants had been enrolled and again at the end of the study.

**18b) Description of any interim analyses and stopping guidelines**

We have no plans for interim analyses or pre-specified stopping rules. The DSMB will decide if the study is safe when 50% of the participants will be enrolled (without comparisons).

The Sponsor may temporarily or permanently discontinue the study for safety, ethical, compliance or other reasons. If the study is suspended or discontinued, the Investigator will be responsible for promptly informing the IRB/IEC. Where required by local regulations, the Sponsor will be responsible for informing the IRB/IEC of study or site discontinuation. In such cases, all study data and unused Investigational Medicinal Products must be returned to the Sponsor.

**19) Harms**

**19a) Definitions**

An adverse event (AE) is defined as any untoward medical occurrence in the form of signs, symptoms, abnormal laboratory findings, or diseases that emerges or worsens relative to baseline (i.e. present at the initial study visit) during a clinical study with an IMP, regardless of causal relationship and even if no Investigational Medicinal Product has been administered.

AEs may include the following types of occurrences:

- Suspected adverse drug reactions
- Other medical experiences, regardless of their relationship with the IMP, such as injury, surgery, accidents, extensions of symptoms or apparently unrelated illnesses, and significant abnormalities in clinical laboratory values, psychological testing or physical examination findings - Reactions from IMP overdose, abuse, withdrawal, sensitivity, toxicity or failure of the IMP's expected pharmacological action

Those medical conditions related to the disease under study whose changes during the study are consistent with natural disease progression, or which are attributable to a lack of clinical efficacy of the investigational medicinal product, are NOT considered as AEs and should not be recorded in the CRF. All other medical conditions which are present at baseline should not be considered as AEs unless a worsening has occurred.

In cases of surgical or diagnostic procedures, the condition/illness leading to such a procedure is considered as the AE rather than the procedure itself.

In case of a fatality, the cause of death is considered as the AE, and the death is its "outcome".

**19b) Severity**

Investigators need to assess the severity of adverse events using the following definitions:

Mild: The subject is aware of the event or symptom, but the event or symptom is easily tolerated.

Moderate: The subject experiences sufficient discomfort to interfere with or reduce his or her usual level of activity.

Severe: Significant impairment of functioning: the subject is unable to carry out usual activities.

### **19c) Causality**

Investigators also need to assess the relationship of AEs to the investigational product using the following definitions:

Probable: A causal relationship is clinically/biologically highly plausible and there is a plausible time sequence between onset of the AE and administration of the investigational product and there is a reasonable response on withdrawal.

Possible: A causal relationship is clinically/biologically plausible and there is a plausible time sequence between onset of the AE and administration of the investigational product.

Unlikely: A causal relationship is improbable and another documented cause of the AE is most plausible.

Unrelated: A causal relationship can be definitively excluded and another documented cause of the AE is most plausible.

### **19d.1) Eliciting Adverse Events**

Data on adverse events will be obtained at scheduled or unscheduled study visits, based on information spontaneously provided by the subject and/or through questioning of the subject. Adverse event data may also be obtained from subject diary cards, but information thus collected must be reviewed and assessed medically before it is transcribed to the CRF.

To elicit adverse events, questioning at each study visit should begin with simple non-leading questions. For example:

- How have you felt since your last visit?
- Have you had any health problems since you were here last?

If a subject is seen by a physician not involved with the study in relation to an adverse event, the Investigator should make every effort to contact the treating physician in a timely manner in order to obtain all information necessary to appropriate reporting of the event.

#### **19d.1.1) Recording of Adverse Events in the CRF**

As the quality and precision of acquired AE data are critical, Investigators should use the adverse event definitions provided in the above sections and should observe the following guidelines when completing the AE pages of the CRF:

- Whenever possible, recognized medical terms should be used to describe AEs rather than colloquialisms (for example, 'influenza' rather than 'flu'), and abbreviations should be avoided.
- Adverse events should be described using a specific clinical diagnosis, if this is available, rather than a list of component signs or symptoms (for example, 'congestive heart failure' rather than 'dyspnoea, rales and cyanosis.')
- However, signs and symptoms that are not linked (as "co-manifestations") to an identified disease or syndrome, or for which an overall diagnosis is not available, should be reported as individual AEs.
- Provisional diagnosis (e.g. "suspected asthma") are acceptable but should be followed up to a definite diagnosis if finally available.
- Adverse events occurring secondary to other events (e.g. sequelae or complications) should be identified by the primary cause. A primary AE, if clearly identifiable, generally represents the most accurate clinical term to record in the CRF. The Investigator should be invited to provide his/her opinion of which is the primary AE, or "Reporter's highlighted term".

Additional guidance can be found in the CRF Completion and Monitoring documents provided by the Sponsor.

### **19d.2) Reporting of Adverse Events**

The Investigator/Reporter must notify the Principal Investigator on behalf of the study sponsor IRCCS G. Gaslini within 24 hours of awareness of a new SAE or of new information on a previously reported SAE (=follow-up).

To do so, the Investigator/Reporter must complete a SAE report following specific instructions (SAE report Completion Instruction) and using preferably the electronic template, and send it directly to the Principal Investigator by electronic mail or facsimile, using the dedicated e-mail address and facsimile numbers specified below

e-mail: [gmarcoghiggeri@gaslini.org](mailto:gmarcoghiggeri@gaslini.org)

fax: +39010 395214

For any new SAE, the following minimum information is required as initial notification:

- Clear identification of the Investigator/Reporter with full contact information
- Subject identification details (study number, site number, initials, date of birth),
- IMP administration details (dose and dates)
- Diagnosis of the event with the description (or a brief description of signs/symptoms/clinical course if the diagnosis is not available) and the date of onset,
- Reason(s) for considering the event serious, and,
- Relationship of the event with the Investigational Medicinal Product or with the trial procedure (e.g., the causality according to the Investigator). In addition, the Investigator/Reporter must respond to any request for follow-up information or questions the Sponsor may have regarding the AE within the same timelines as for initial reports.

#### **19d.3) Serious adverse events**

Any serious adverse event requires expedited reporting to the Sponsor safety department, regardless of its relationship to the Investigational Medicinal Product. It includes the SUSAR (Suspected Unexpected Serious Adverse Event).

A serious adverse event (SAE) is defined as an AE that at any dose:

- Results in death

i.e. the AE causes or contributes to the death.

- Is life-threatening

i.e. the AE places the subject at immediate risk of death; the definition does not apply to an AE that hypothetically might cause death if it were more severe.

- Requires or prolongs inpatient hospitalization

i.e. the AE requires at least a 24-hour inpatient hospitalization or prolongs a hospitalization beyond the expected length of stay. Hospital admissions for IMP administration, for surgery planned before study entry, for social reasons or for normal disease management (including treatment adjustment) are not to be considered as SAE according to this criterion.

- Is a congenital anomaly or birth defect

i.e. an adverse outcome in a child or foetus of a subject exposed to the Investigational Medicinal Product before conception or during pregnancy.

- Results in persistent or significant disability or incapacity

i.e. the AE resulted in a substantial disruption of the subject's ability to conduct normal activities.

- Is a medically important condition

Such an event may not be immediately life-threatening or result in death or hospitalization but it is clearly of major clinical significance. The AE may jeopardize the subject or require intervention to prevent a serious outcome.

#### **19d.4) Reporting to the institutional review board/independent ethics committee**

The Investigator will comply with any applicable requirements related to the reporting of SAEs involving his/her subjects to the Institutional Review Board/Independent Ethics Committee (IRB/IEC) that approved the study. In particular, all deaths will be promptly reported to the IRB/IEC that approved the study.

In accordance with ICH GCP guidelines, the Sponsor will inform the Investigator of “findings that could affect adversely the safety of subjects, impact the conduct of the trial or alter the IRB/IEC’s approval/favorable opinion to continue the trial.” In particular and in line with respective regulations and the Sponsor policy, the Sponsor will inform the Investigator of adverse events that are both serious and unexpected (i.e. unlisted as per the RTX Pharmaceutical Company Core Safety Information) and are considered to be possibly or probably related to the administered product by the Investigator/Reporter. The Investigator will keep copies of these safety reports in the Investigator file. National regulations with regards to Safety reports notifications to Investigators will be taken into account.

Unless clearly defined otherwise by national or site-specific regulations, and are duly documented, the responsible Investigator will promptly notify the concerned IRB/IEC of any safety reports provided by the Sponsor and provide copies of all related correspondence to the Sponsor. Only when specifically required by regulations, will the Sponsor provide appropriate Safety reports directly to the concerned IRB/IEC and maintain records of these notifications.

Data on adverse events will be obtained at scheduled or unscheduled study visits, based on information spontaneously provided by the subject and/or through questioning of the subject. Adverse event data may also be obtained from subject diary cards, but information thus collected must be reviewed and assessed medically before it is transcribed to the CRF.

To elicit adverse events, questioning at each study visit should begin with simple non-leading questions. For example:

- How have you felt since your last visit?
- Have you had any health problems since you were here last?

If a subject is seen by a physician not involved with the study in relation to an adverse event, the Investigator will make every effort to contact the treating physician in a timely manner in order to obtain all information necessary to appropriate reporting of the event

The Investigator/Reporter will notify the Principal Investigator on behalf of the study sponsor IRCCS G. Gaslini within 24 hours of awareness of a new SAE or of new information on a previously reported SAE (=follow-up).

To do so, the Investigator/Reporter must complete a SAE report following specific instructions (SAE report Completion Instruction) and using preferably the electronic template, and send it directly to the Principal Investigator by electronic mail or facsimile, using the dedicated e-mail address and facsimile numbers specified below

e-mail: [gmarcoghiggeri@gaslini.org](mailto:gmarcoghiggeri@gaslini.org)

fax: +39010 395214

For any new SAE, the following minimum information is required as initial notification:

- Clear identification of the Investigator/Reporter with full contact information
- Subject identification details (study number, site number, initials, date of birth),
- IMP administration details (dose and dates)
- Diagnosis of the event with the description (or a brief description of signs/symptoms/clinical course if the diagnosis is not available) and the date of onset,
- Reason(s) for considering the event serious
- Relationship of the event with the Investigational drug

## **20) Auditing**

The Investigator or his/her delegate will ensure that paper- and e-CRFs are completed in a timely manner and must allow a study monitor periodical access to paper and e-CRFs, subject records and all study-related materials, including IMP. The frequency of monitoring visits will be determined by factors such as the design of the study, the frequency of subject visits and the site enrolment rate. In order to verify that the study is conducted in accordance with ICH GCP, regulatory requirements, and the study protocol and that

the data are authentic, accurate and complete, the study monitor will review e-CRFs and other study documents and will conduct source data verification according to the Study Monitoring Plan.

Upon study completion, the study monitor will visit the site to conduct a Study Termination Visit. This will involve collection of any outstanding documentation.

**21) Description of the complementary and synergy research team:**

Our team is composed by two clinical units operating at the two major Italian pediatric hospitals (IRCCS Gaslini, Genova and IRCCS Ospedale Bambin Gesù, Roma) and includes both clinical teams and research personnel expert in molecular genetics and cell biology. Recruitment of patients and coordination of the study are the tasks of the two team-leaders (GM. Ghiggeri, F. Emma) and their coworkers while basic studies aimed at characterizing the cell target of anti-CD20 will be done by the other participants (Gaslini: F. Lugani, and G. Caridi, OPGB: M. Vivarelli). The external collaboration with Pediatric Nephrology of University of Padua (L. Murer) will further enhance the team strengths. All participants have already collaborated with success in preceding clinical trials and share almost all the basic considerations on the therapeutic strategies that are topics of the present project. Clinical and research synergies are in this sense complete; cell biology know-how is in particular complimentary to the clinical resources and represent a major strength of the group. The University of Calgary, Canada, (a center of excellence in clinical epidemiology) will be responsible for the randomization procedures and for any work related to data analysis. Once again, the PI of this project (GM. Ghiggeri) and the PI of the foreign unit (P. Ravani) had strong collaboration ties as demonstrated by several clinical trials already completed and published in this field of research.

Interventions will be administered during hospitalization in the Nephrology Unit of the Giannina Gaslini Children's Hospital, Genoa and in the Nephrology Unit of Ospedale Bambino Gesù, Rome. Follow up visits will be performed at the nephrology outpatient clinics of Giannina Gaslini Children's hospital and of Ospedale Bambino Gesù.

**22) Training and tutorial activities:**

Two types of training courses will be organized to implement the quality of the group: a first course has cell biology as topic and it is devoted to train our lab personnel to the use of new flow-cytometry techniques. A second course will focus on biostatistics and in particular is aimed to train medical personnel to a proper use of statistics and statistical facilities (computerized data base, analysis programs, etc.) in randomized clinical trial. All of these will be carried out utilizing internal facilities and will be addressed to the medical, lab and nursing staff.

**23) Timeline/ Deliverables/Payable Milestones**

The study is divided into two successive steps:

- a- recruitment and treatment of patients that will be concluded within 12-18 months;
- b- clinical follow-up with programmed visits and laboratory tests during the 12-24 months that follow drug infusion.

. A first deliverable is the consolidation of RTX as treatment of choice of SDNS; this would complete and hopefully conclude a long series of studies on therapy of NS that started almost 50 years ago with steroids and continued with CNI and more recently with MMF. Definition of clinical effects of RTX in terms of length of remission out of therapy compared to classical approaches (MMF) that are of current use. A second deliverable is the definition of cell targets of RTX that should improve our understanding of mechanisms implicated in NS and produce some evolution in the area of biomarkers of drug sensitivity of NS. Clinical effects and laboratory results should be available in a part of patients at 18 months and be completed by the end of the study in all.



**24) Milestones 18 month-36 month****18 month**

Recruitment, randomization and treatment should be completed within 18 months and for those patients treated at the beginning, results should already be available by this time. We also expect to have completed many laboratory tests for several patients within the first 18 months. Conceptual feed-backs from these studies are expected that could change the cell biology and molecular approaches of the second part of the project.

**36 month**

The hard 36 month milestone is the conclusive result on clinical outcome of patients allocated in the two different treatments (RTX vs MMF). Considering that allocation and treatment are expected to be concluded in the first 18 months, almost all patients would have been concluded the 24 month follow-up at this point. Laboratory deliverable would be conclusive at 36 month and new experimental approaches based on results deriving from the preliminary part would hopefully be available.

**25) Equipment and resources available:**

The two nephrology units that propose the project (Istituto G. Gaslini and Ospedale Bambino Gesù) are structurally and functionally equipped with all facilities necessary to evaluate, treat and follow patients allocated in the two arms of the study. Twenty beds for recovery are available overall and there is the possibility to follow patients on a out-door base. The capacity of the two units is to follow 1200 patients/year in recovery and almost 5.000 patients out-door. Besides specialized medical and nurse personnel, the two units are equipped with secretary facilities, spaces for recovery of data sets, meetings and discussions. Centralized pharmacy service equipped with sterile rooms for preparation of drug solutions are available at both nephrology departments. Bio-statistical approaches are centralized at the foreign unit (dry lab of Dr Ravani and his team). The laboratory part will be carried out inside the two nephrology units, where the following cell facilities are available: a Genoa- cell separation apparatus (Laminar flood hood Steril-VBH Class II Tecnomed); Centrifuge (Eppendorf5810R); microscope for cell cultures (Olympus CK2); Flow Cytometer LSR-Fortessa X20 (Becton Dickinson) equipped with three lasers (Red, Violet, Blue for simultaneous determination of 14 different fluorochromes). These instruments are located at the Cell and Tissue Culture Section of Rosanna Gusmano Laboratory, Department of Pediatrics and at the Core Facility Laboratory, Department of Translational Medicine G.Gaslini Institute. Ospedale Bambino Gesù's Research Laboratories are located in a 5,000 sqm meters research facility, fully equipped with high-tech systems, supporting genomics, metagenomics, metabolomics, proteomics, microarray technology, cytogenetic and FISH applications, cytofluorimetry and cell sorting, cell and molecular biology: fast real time qPCR systems, also with array technology to provide flexible solutions for high-throughput gene expression, miRNA, or genotyping analysis. In particular for FACS analysis, flow cell analysers, also with laser technology, enabled complex multicolour analysis with up to 18 simultaneous colours; flow cell sorter with 6 laser wavelengths and 20 detector positions to measure up to 18 colours simultaneously.

**26) Translational relevance and impact for the National Health System (SSN)**

After years of use of cyclophosphamide and cyclosporine for the treatments of choice of steroid-dependent nephrotic syndrome, anti-CD20 antibodies are emerging as innovative approach in cases with mid dependence. In this study we are proposing to utilize a fully humanized anti-CD20 antibody that has been already tested with success in other forms of nephrotic syndrome. Considering low impact of side effects, a simple handling during drug infusion and comparable costs with Rituximab has emerged as the potential treatment of choice in this disease. Comparison with MMF is the crucial point of this project. In this case comparative costs for RTX are markedly reduced: hypothesizing one infusion of RTX (500mg/1.73m<sup>2</sup>) per 12 months the cost is 1280 E/year (full price) compared to MMF 1200mg/1,73m<sup>2</sup> day that, for a theoretical dose of 750 mg corresponds to 1800 E/year.

**27) Research ethics approval**

Before initiation of the study, written approval of the protocol, Informed Consent Form and any information presented to potential subjects must be obtained from the appropriate Institutional Review Board (IRB) or Independent Ethics Committee (IEC).

**28) Protocol amendments**

If any amendments to the protocol occur during the study, written approval must be obtained prior to its implementation. The Investigator is responsible for ensuring that these actions occur. Where required by local regulations, the Sponsor is responsible for ensuring IRB/IEC approval of the study.

**29) Consent or assent**

Before a pediatric subject can participate in the study, her or his parents/legal tutor must give written informed consent and the subject provide her/his assent as appropriate for the age.

The informed consent process will be in accordance with ICH GCP, the Declaration of Helsinki and local regulatory requirements.

Parents/tutor and minor subject Informed Consent/Assent Forms will be based on a master document provided by the G. Gaslini Institute for submission to the Independent Ethics Committee (IEC)

**30) Confidentiality**

The Investigator will ensure that the subjects' anonymity is maintained. On the paper- and e-CRFs or other documents submitted to the principal Investigator, subjects should not be identified by their names, but by their assigned identification number and initials. If subject names are included on copies of documents submitted to the principal Investigator, the names (except for initials) must be obliterated and the assigned subject numbers added to the documents.

The Investigator should keep a separate log of subjects' identification numbers, names, addresses, telephone numbers and hospital numbers (if applicable). Documents not for submission to the principal Investigator, such as signed Informed Consent /Assent Forms, should be maintained in strict confidence by the Investigator.

**31) Declaration of interests**

There are no financial or other competing interests for principal investigator to disclose.

**32) Dissemination policy**

**32a) Plans for investigators and sponsor to communicate trial results**

The completed study will be summarized in a final report that accurately and completely presents the study objectives, methods, results, limitations of the study, and interpretation of findings.

The first publication will be an *in extenso* publication of the results of the validation of the project.

The Authors of this study protocol will inform the contributing investigators in advance about any plans to publish or present data from this randomized controlled clinical trial. Any publications and presentations of the results (abstract in journals or newspapers, oral presentations, etc.), either in whole or in part, by Investigators or their representatives will require pre-submission review by the Authors of this study protocol.

**32b) Authorship eligibility guidelines and any intended use of professional writers**

Gian Marco Ghiggeri will write the main report.

Table1.

| Visit schedule                                                                                                                                                                                                                          | 1                                | 2 | 3 | 4 | 5 | 6  | 7  | 8  |
|-----------------------------------------------------------------------------------------------------------------------------------------------------------------------------------------------------------------------------------------|----------------------------------|---|---|---|---|----|----|----|
|                                                                                                                                                                                                                                         | -45<br>days<br>(Run-in<br>Start) | 0 | 1 | 3 | 6 | 12 | 18 | 24 |
| <b>Months</b>                                                                                                                                                                                                                           |                                  |   |   |   |   |    |    |    |
| <b>Relevant medical History</b>                                                                                                                                                                                                         | x                                | x |   |   |   |    |    |    |
| <b>Inclusion and Exclusion Criteria</b>                                                                                                                                                                                                 | x                                | x |   |   |   |    |    |    |
| <b>Project Illustration</b>                                                                                                                                                                                                             | x                                |   |   |   |   |    |    |    |
| <b>Informed consent</b>                                                                                                                                                                                                                 | x                                |   |   |   |   |    |    |    |
| <b>Randomization</b>                                                                                                                                                                                                                    |                                  | x |   |   |   |    |    |    |
| <b>Physical Examination &amp; Vital Signs</b>                                                                                                                                                                                           | x                                | x | x | x | x | x  | x  | x  |
| <b>Dosage on 24-Hours Urine Collection</b>                                                                                                                                                                                              | x                                | x | x | x | x | x  | x  | x  |
| <b>Haematology and Biochemistry</b> ( <i>Complete blood count, kidney function, plasma proteins, immunoglobulins, lipid status -cholesterol and triglycerides-, albumin, lymphocyte subpopulations -for CD20 lymphocytes B count-</i> ) | x                                | x | x | x | x | x  | x  | x  |
| <b>HBV Sierology</b>                                                                                                                                                                                                                    | x                                |   |   |   |   |    |    |    |
| <b>Investigational Medicinal Product (IMP)administration</b>                                                                                                                                                                            |                                  | x |   |   |   |    |    |    |
| <b>Instruction about immunosuppressive drugs tapering</b>                                                                                                                                                                               | x                                |   |   |   |   |    |    |    |
| <b>Adverse Events data records</b>                                                                                                                                                                                                      |                                  | x | x | x | x | x  | x  | x  |
| <b>Drug use/dose records</b>                                                                                                                                                                                                            | x                                | x | x | x | x | x  | x  | x  |

## **References**

1. - Hodson EM et al. Corticosteroid therapy for nephrotic syndrome in children. The Cochrane database of systematic reviews: CD001533, 2005.
- 2.- Ravani P et al. Short-term effects of rituximab in children with steroid- and calcineurin-dependent nephrotic syndrome: a randomized controlled trial. *Clin J Am Soc of Nephrol* 6:1308-1315, 2011.
- 3.- Iijima K et al, on behalf of the Rituximab for Childhood-onset Refractory Nephrotic Syndrome Study, G: Rituximab for childhood-onset, complicated, frequently relapsing nephrotic syndrome or steroid-dependent nephrotic syndrome: a multicentre, double-blind, randomised, placebo controlled trial. *Lancet*. 384:1273-1281, 2014
- 4.- Ravani P et al. Rituximab in children with steroid-dependent nephrotic syndrome: a multicentre, open-label, non inferiority, randomized controlled trial. *J Am Soc Nephrol* 26(9):2259-2266, 2015
- 5.- Ravani P et al. Randomised controlled trial comparing ofatumumab to rituximab in children with steroid-dependent and calcineurin inhibitor-dependent idiopathic nephrotic syndrome: study protocol. *BMJ Open* 17;7(3) 2017
- 6.- Robak T et al. Ofatumumab, a human monoclonal antibody for lymphoid malignancies and autoimmune disorders. *Curr Opin Mol Ther* 10: 292-309, 2008
- 7.- Taylor PC et al. Ofatumumab, a fully human anti-CD20 monoclonal antibody, in biological-naive, rheumatoid arthritis patients with an inadequate response to methotrexate: a randomised, double-blind, placebo-controlled clinical trial. *Ann Rheum Dis*. 70:2119-2125, 2011
- 8.- Biswanath Basu. Ofatumumab for Rituximab-Resistant Nephrotic Syndrome, *NEJM* 370:1268-1270, 2014
- 9.-
- 9.- Bonanni A, et al. Low-dose ofatumumab for rituximab-resistant nephrotic syndrome. *BMJ Case Rep*. *BMJ Case Rep*. pii:bcr2015210208. doi: 10.1136/bcr-2015-210208 2015.
- 10-Bonanni et al. Adverse events linked with the use of chimeric and humanized anti-CD20 antibodies in children with idiopathic nephrotic syndrome. *Br J Clin Pharmacol* 84(6):1238-1249, 2018
- 11.- Bertelli R et al Molecular and Cellular Mechanisms for Proteinuria in Minimal Change Disease. *Front Med* 11;5:170,2018.
- 12- Ravani P et al. Anti-CD20 Antibodies for Idiopathic Nephrotic Syndrome in Children. *Clin J Am Soc Nephrol* 11:710-20, 2016

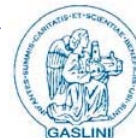

Genoa, February 08<sup>th</sup> 2019

Gian Marco Ghiggeri (P.I.)

Dr. Gian Marco Ghiggeri  
Responsabile  
U.O. Nefrologia e Dialisi  
Istituto Giannina Gaslini





**MODULO DI COMUNICAZIONE AL RICHIEDENTE E AD AIFA DELLA DECISIONE  
DEL COMITATO ETICO RELATIVA ALL'EMENDAMENTO SOSTANZIALE**

Da inviare al Richiedente e all'AIFA a cura del Comitato Etico che esprime il parere unico.  
Da inviare solo al Richiedente a cura del Comitato Etico collaboratore.  
All'AIFA non devono essere inviati i pareri del Comitato etico satellite e i pareri del Comitato etico  
coordinatore espressi su materie esclusive del Comitato etico: informazioni ai partecipanti, strutture e  
personale, questioni finanziarie.

009-11/03/2019 (166/2018)

**A. IDENTIFICAZIONE DELLA SPERIMENTAZIONE**

**A.1 Numero EudraCT:** 2018-001042-33

**A.2 Titolo completo della sperimentazione:**

"Efficacy of chimeric anti-CD20 antibodies (Rituximab Biosimilar) in the  
treatment of childhood steroid dependent nephrotic syndrome and development  
of cell biomarkers predicting outcome. The RTX 4 trial."

**A.3 Codice, versione e data del protocollo del promotore**

**Codice:** RTX4

**Versione:** RTX4 n. em.1

**Data:** 08/02/2019

**B. IDENTIFICAZIONE DEL COMITATO ETICO (CE)**

*(costituito ai sensi del DM 8 febbraio 2013)*

**B.1 Denominazione del CE:** Comitato Etico Regione Liguria

**B.2 Nome e cognome del Presidente:** Avv. Paolo Gianatti

**B.3 Indirizzo del CE:** c/o Largo Rosanna Benzi, 10 16132 Genova (GE)

**B.4 Numero di telefono:** 010 555 4212 /4213 /4214 /4215 /4216 /4217

**B.5 Numero di fax:** 010 555 6326

**B.6 E-mail:** comitato.etico@hsanmartino.it

Indicare il Comitato Etico coordinatore dello studio, se diverso da quanto  
specificato nella sezione B:

**C. IDENTIFICAZIONE DELLO SPERIMENTATORE**

**C.1 Nome:** GianMarco      **C.2 Cognome:** Ghiggeri

**C.3 Centro clinico:** IRCCS G. Gaslini

**C.4 Indirizzo del centro clinico:** Largo G. Gaslini, 5

**C.5 Reparto:** U.O.C. di Nefrologia

**Appendice relativa al parere su un emendamento sostanziale**  
**Modulo da utilizzare per la gestione transitoria a seguito della sospensione dei sistemi informativi dell'OsSC a partire dal 1.1.2013**

**D. DOCUMENTAZIONE ESAMINATA**

(Legenda: NA, Non Applicabile)

|             |                                                                                                                                             |                                                |
|-------------|---------------------------------------------------------------------------------------------------------------------------------------------|------------------------------------------------|
| <b>D. 1</b> | <b>Data di ricezione della domanda:</b> 01/03/19                                                                                            |                                                |
| <b>D. 2</b> | <b>Domanda di emendamento (Appendice 9)</b><br>Specificare codice, versione/ e data dell'emendamento:<br><br>"RTX4 n. em. 1 del 08/02/2019" | <b>X</b>                                       |
| <b>D. 3</b> | <b>Modulo della domanda iniziale (Appendice 5), se modificato dall'emendamento</b>                                                          | <b>X SI</b> <input type="checkbox"/> <b>NA</b> |

**E. DECISIONE DEL COMITATO ETICO**

|            |                                                    |                          |
|------------|----------------------------------------------------|--------------------------|
| <b>E.1</b> | <b>Parere favorevole</b>                           | <b>X</b>                 |
| <b>E.2</b> | <b>Parere non favorevole</b>                       | <input type="checkbox"/> |
| <b>E.3</b> | <b>Sperimentazione da condurre presso</b>          |                          |
|            | E.3.1 Stessa struttura                             | <input type="checkbox"/> |
|            | E.3.2 Altra struttura <i>dettagli in sezione C</i> | <b>X</b>                 |

**F. ASPETTI PARTICOLARI DELL'EMENDAMENTO CONSIDERATI DAL CE NEL PROCESSO DI VALUTAZIONE (testo libero)**

|                                                                                                                                                                                                                                                               |
|---------------------------------------------------------------------------------------------------------------------------------------------------------------------------------------------------------------------------------------------------------------|
| <i>Documentazione esaminata:</i><br><br>Si veda elenco documenti presenti in Appendice 9 e Modulo – Dati integrativi alla richiesta di parere- allegati al presente Parere.<br><br>Il comitato Etico si riserva di acquisire eventuali considerazioni di AIFA |
|---------------------------------------------------------------------------------------------------------------------------------------------------------------------------------------------------------------------------------------------------------------|

**G. MOTIVAZIONI DEL CE CHE HANNO DETERMINATO IL RIFIUTO DELL'EMENDAMENTO**

|            |                                                                 |                          |
|------------|-----------------------------------------------------------------|--------------------------|
| <b>G.1</b> | Protocollo                                                      | <input type="checkbox"/> |
| <b>G.2</b> | Informazione dei soggetti e procedure per il consenso informato | <input type="checkbox"/> |
| <b>G.3</b> | Aspetti etici                                                   | <input type="checkbox"/> |
| <b>G.4</b> | Dati clinici                                                    | <input type="checkbox"/> |
| <b>G.5</b> | Dati di farmacologia non clinica e tossicologica                | <input type="checkbox"/> |
| <b>G.6</b> | Dati di qualità del medicinale sperimentale                     | <input type="checkbox"/> |
| <b>G.7</b> | Copertura assicurativa insufficiente                            | <input type="checkbox"/> |
| <b>G.8</b> | Altro, specificare:                                             | <input type="checkbox"/> |

**H. DESCRIZIONE DELLE MOTIVAZIONI DEL CE CHE HANNO DETERMINATO IL  
RIFIUTO DELL'EMENDAMENTO (testo libero)**

**I. SEDUTA DEL COMITATO ETICO**

- I.1 Data della seduta: 11/03/2019**

**I.2 Numero del Registro dei pareri del Comitato etico: 009-11/03/2019  
(166/2018)**

**I.3 Componenti del CE presenti e qualifiche:**

Si veda Foglio Firme allegato al Parere

**I.3.1 Sostituti permanenti che hanno partecipato alla seduta in vece  
dei membri *ex officio*:**

**I.4 Consulenti esterni presenti e qualifiche (*ove applicabile*):**

**I.5 Componenti del CE presenti che non hanno partecipato alla votazione  
(*ove applicabile*):**

**L. FIRMA DEL PRESIDENTE DEL COMITATO ETICO**

- L.1 Il Comitato Etico ha espresso il parere sull'emendamento sostanziale  
verificata la sussistenza del numero legale, essendo presenti membri  
n. 11 su n. 16.**

*Si allega al presente parere copia del modulo di domanda (appendice 9) nella forma  
prescritta.*

**L.2 Nome e Cognome: Avv. Paolo Gianatti**

**L.3 Data: 11/03/2019**

**L.4 Firma:**





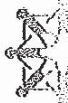

Comitato  
Etico  
Regionale

Verbale Riunione N. 04/2019

Seduta dl Comitato Etico Regionale della Liguria del 11/03/2019

Ospedale Policlinico San Martino - IRCCS, Sala delle Ceramiche, Genova

Ora inizio: 15:00

Ora termine: 17:00

| COMPONENTI OBBLIGATORI AI FINI DEL QUORUM                     | Lettera (D.G.R. 973/17)                           | Area       | PRESENZE |
|---------------------------------------------------------------|---------------------------------------------------|------------|----------|
| Prof. SOBRERO ALBERTO                                         | a                                                 | CL         |          |
| Prof. SERRATI CARLO (Sostituto Presidente)                    | a                                                 | CL         |          |
| Dr. PARODI LIONELLO                                           | a                                                 | CL         |          |
| Dr. STELLINI GIUSEPPE FABIO                                   | b                                                 | MMG        |          |
| Dr. FISCELLA MARIO                                            | c                                                 | PED        |          |
| Dr. GATTORNO MARCO                                            | c                                                 | PED        |          |
| Dr.ssa LANTIERI FRANCESCA                                     | d                                                 | BIOSTAT    |          |
| Prof. ROBBIANO LUIGI                                          | e                                                 | FARMA      |          |
| Dr.ssa REBESCO BARBARA                                        | f                                                 | FARMA SSR  |          |
| Avv. GIANATTI PAOLO (Presidente)                              | g                                                 | LEG        |          |
| Prof.ssa CILIBERTI ROSAGEMMA                                  | h                                                 | BIOET      |          |
| Dr. ZANINI MILKO                                              | i                                                 | PROF SAN   |          |
| Dr.ssa FREDDI LILIANA                                         | l                                                 | VOL        |          |
| Dr. GHIGLIOTTI GIORGIO                                        | m                                                 | DISP       |          |
| COMPONENTI IN RELAZIONE ALLA SPECIFICA PROFESSIONALITA'       | Lettera                                           | Area       |          |
| Ing. SPADA GINO                                               | n                                                 | ING        |          |
| Dr. GALLO FABRIZIO                                            | o                                                 | DIET       |          |
| Prof. PATRONITI NICOLÒ ANTONINO                               | p                                                 | NUOVE PROC |          |
| Dr.ssa GHIORZO PAOLA                                          | q                                                 | GEN        |          |
| COMPONENTI IN RELAZIONE ALLA STRUTTURA COINVOLTA NELLO STUDIO | Qualifica (lettera g ai sensi del D.M. 08/02/13)  |            |          |
| Dr. ORSATTI MARCO                                             | Sostituto permanente Dir. San. Asl1               |            |          |
| Dr.ssa BUSCAGLIA SANDRA                                       | Sostituto permanente Dir. San. Asl2               |            |          |
| Avv. DEPETRO GIOVANNA                                         | Sostituto permanente Dir. San. Asl3               |            |          |
| Dr. CARDINALE FRANCESCO                                       | Sostituto permanente Dir. San. Asl4               |            |          |
| Dr.ssa MORUZZO MIRCA                                          | Sostituto permanente Dir. San. Asl5               |            |          |
| Dr. ROLLANDI GIAN ANDREA                                      | Sostituto permanente Dir. San. E.O.Osp. Galliera  |            |          |
| Prof. MINETTI CARLO                                           | Dir. Scient. IRCCS Ist. Gaslini                   |            |          |
| Dr.ssa CHIOZZA M. BEATRICE                                    | Sostituto permanente Dir. San. IRCCS Ist. Gaslini |            |          |
| Dr. FLEGO GADDO                                               | Dir. San. Osp. Evangelico Internazionale          |            |          |
| Dr. PIERRI MAURO                                              | Dir. San. ICLAS, Rapallo                          |            |          |
| Prof. UCCELLI ANTONIO                                         | Dir. Scient. IRCCS Policlinico S. Martino         |            |          |
| Dr.ssa MARTELLI FRANCA                                        | Dir. San. IRCCS Policlinico S. Martino            |            |          |

**MODULO DI DOMANDA DI AUTORIZZAZIONE ALL'AIFA E DI PARERE AL  
COMITATO ETICO PER UN EMENDAMENTO SOSTANZIALE AD UNA  
SPERIMENTAZIONE CLINICA DEI MEDICINALI AD USO UMANO**

Parte riservata all'AIFA e al Comitato Etico:

|                                                                                                     |                                                                                          |
|-----------------------------------------------------------------------------------------------------|------------------------------------------------------------------------------------------|
| Data di ricezione della presente domanda:<br>01/03/2019                                             | <input type="checkbox"/> Obiezioni motivate / parere negativo:<br>Data: _____            |
| Data di avvio della procedura:<br>/                                                                 | <input checked="" type="checkbox"/> Autorizzazione / parere favorevole<br>Data: 11/03/19 |
| Numero di protocollo o equivalente, attribuito alla pratica in entrata:<br>009-11/03/19<br>166/2018 | <input type="checkbox"/> Ritiro della domanda di emendamento<br>Data: _____              |

Da compilare a cura del richiedente:

DOMANDA DI AUTORIZZAZIONE ALL'AIFA:

DOMANDA DI PARERE AL COMITATO ETICO:

**A. IDENTIFICAZIONE DELLA SPERIMENTAZIONE** (quando l'emendamento riguarda più di una sperimentazione, ripetere questo modulo)

A.1 L'emendamento sostanziale riguarda più di una sperimentazione che utilizza lo stesso IMP? <sup>1</sup>  SI  No X

A.1.1 Se sì, ripetere le informazioni da A.2 a A.4

A.2 Numero EudraCT: 2018-001042-33

A.3 Titolo completo della sperimentazione: Efficacy of chimeric anti-CD20 antibodies ( Rituximab Biosimilar) in the treatment of childhood steroid-dependent nephrotic syndrome and development of cell biomarkers predicting outcome. The RTX 4 trial.

A.4 Codice, versione e data del protocollo del promotore  
Codice: RTX4  
Versione: RTX4 n. em.1  
Data: 08/02/2019

Note:  
<sup>1</sup>- Si veda anche la sezione 3.7 della linea guida CT-1 del 30.3.2010 "Detailed guidance for the request for authorisation of a clinical trial on a medicinal product for human use to the competent authorities, notification of substantial amendments and declaration of the end of the trial".

**B. IDENTIFICAZIONE DEL PROMOTORE RESPONSABILE DELLA DOMANDA**

**B.1 PROMOTORE**

B.1.1 Ente: IRCCS G. Gaslini

B.1.2 Nome e cognome della persona di riferimento: GianMarco Ghiggeri

B.1.3 Indirizzo: Via G. Gaslini 5

B.1.4 Numero di telefono: +39-010-5636-3523

B.1.5 Numero di fax: +39010 395214

B.1.6 E-mail: GMarcoGhiggeri@gaslini.org

**B.2 RAPPRESENTANTE LEGALE <sup>2</sup> DEL PROMOTORE NELLA UE AI FINI DELLA PRESENTE SPERIMENTAZIONE** (se diverso dal promotore)

B.2.1 Ente:

B.2.2 Nome della persona di riferimento:

B.2.3 Indirizzo:

B.2.4 Numero di telefono:

B.2.5 Numero di fax:

B.2.6 E-mail:

Note:  
<sup>2</sup>- Come previsto dall'articolo 20 del D.Lvo n. 231/2003.

**B.3 TIPO DI PROMOTORE**

B.3.1 Commerciale  B.3.2 Non commerciale X

**C. IDENTIFICAZIONE DEL RICHIEDENTE**

C.1 Promotore

C.2 Individuo o Organizzazione autorizzata dal promotore a presentare la domanda:

C.3 Dati anagrafici

C.3.1 Ente:

C.3.2 Nome e cognome della persona di riferimento:

C.3.3 Indirizzo:

C.3.4 Numero di telefono:

C.3.5 Numero di fax

C.3.6 E-mail:

**D. IDENTIFICAZIONE DELL'EMENDAMENTO**

**D.1 Codice dell'emendamento sostanziale:**

D.1.1 Codice, versione e data dell'emendamento assegnati dal promotore:  
RTX4 n. em. 1 del 08/02/2019

**D.2 Tipo di emendamento sostanziale:**

D.2.1 Emendamento ai documenti allegati al CTA form Iniziale  SI  No

(Indicare i documenti modificati a seguito dell'emendamento sostanziale. Non indicare eventuali documenti che sono stati aggiornati e trasmessi nell'ultima versione contestualmente all'emendamento sostanziale la cui modifica tuttavia non rientra nei criteri dell'emendamento sostanziale)

- Lettera di trasmissione AIFA data 08/02/2019
- Lettera di trasmissione CER data 08/02/2019
- Dichiarazione no profit data 08/02/2019
- Domanda autorizzazione AIFA data 08/02/2019
- Protocollo versione 2 del 8/02/2019
- Sinossi versione 2 del 8/02/2019
- Scheda tecnica Rixathon
- Benefit and Risk assessment data 08/02/2019
- Valutazioni etiche data 08/02/2019
- Consenso genitore versione 2 del 8/02/2019
- Consenso maggiorenne versione 2 del 8/02/2019
- Assenso adolescente versione 2 del 8/02/2019
- Assenso preadolescente versione 2 del 08/02/2019
- Lettera medico curante versione 3 del 08/02/2019
- Consenso dati personali genitore versione 2 del 08/02/2019
- Consenso dati personali maggiorenne versione 2 del 08/02/2019
- Assenso dati personali adolescente versione 2 del 08/02/2019
- Assenso dati personali preadolescente versione 1 del 08/02/2019
- Consenso materiale biologico genitore versione 2 del 08/02/2019
- Consenso materiale biologico maggiorenne versione 2 del 08/02/2019
- Assenso materiale biologico adolescente versione 2 del 08/02/2019
- Assenso materiale biologico preadolescente versione 2 del 08/02/2019
- Modulo6 CERLiguria\_Sperim\_NoProfit del 08/02/2019
- Modulo 3 CERLiguria\_CINT del 08/02/2019

D.2.1.1 Informazioni relative al protocollo  SI  No

D.2.1.2 Informazioni relative all'IMP  SI  No

D.2.1.3 Informazioni relative all'Investigator Brochure  SI  No

D.2.1.4 Informazioni relative ai soggetti <sup>3</sup>  SI  No

D.2.1.6 Altro  SI  No

D.2.1.6.1 Se altro, specificare:

**D.2.2 Emendamento ad altri documenti o informazioni**  SI  No



|                                                                                                                 |                                        |                                        |
|-----------------------------------------------------------------------------------------------------------------|----------------------------------------|----------------------------------------|
| D.2.2.1 Cambio del promotore                                                                                    | SI <input type="checkbox"/>            | NO <input type="checkbox"/>            |
| D.2.2.2 Cambio del rappresentante legale                                                                        | SI <input type="checkbox"/>            | NO <input type="checkbox"/>            |
| D.2.2.3 Altro                                                                                                   | SI <input type="checkbox"/>            | NO <input type="checkbox"/>            |
| D.2.2.3.1 Se altro, specificare:                                                                                |                                        |                                        |
| <b>D.2.3 Misure urgenti di sicurezza, sospensione temporanea e ripresa della sperimentazione</b>                |                                        |                                        |
| D.2.3.1 L'emendamento riguarda prevalentemente misure urgenti di sicurezza già introdotte <sup>4</sup>          | SI <input type="checkbox"/>            | NO <input checked="" type="checkbox"/> |
| D.2.3.2 L'emendamento serve a comunicare una sospensione temporanea della sperimentazione <sup>5</sup>          | SI <input type="checkbox"/>            | NO <input checked="" type="checkbox"/> |
| D.2.3.3 L'emendamento serve a richiedere la ripresa di una sperimentazione precedentemente sospesa <sup>6</sup> | SI <input type="checkbox"/>            | NO <input checked="" type="checkbox"/> |
| <b>D.3 Motivi dell'emendamento sostanziale</b>                                                                  |                                        |                                        |
| D.3.1 Sicurezza, diritti, benessere o integrità dei soggetti partecipanti alla sperimentazione                  | SI <input checked="" type="checkbox"/> | NO <input type="checkbox"/>            |
| D.3.2 Interpretazione della documentazione scientifica / valore della sperimentazione                           | SI <input checked="" type="checkbox"/> | NO <input type="checkbox"/>            |
| D.3.3 Modifiche apportate alla qualità del medicinale sperimentale (IMP)                                        | SI <input checked="" type="checkbox"/> | NO <input type="checkbox"/>            |
| D.3.4 Modifiche nell'esecuzione o nella gestione della sperimentazione                                          | SI <input type="checkbox"/>            | NO <input checked="" type="checkbox"/> |
| D.3.5 Cambio o aggiunta di uno sperimentatore / centro clinico (se sì, completare la sezione F) <sup>7</sup>    |                                        |                                        |
| D.3.5.1 Sperimentatore del centro dove opera il comitato etico responsabile del parere unico                    | SI <input type="checkbox"/>            | NO <input checked="" type="checkbox"/> |
| D.3.5.2 Centro dove opera lo sperimentatore coordinatore                                                        | SI <input type="checkbox"/>            | NO <input checked="" type="checkbox"/> |
| D.3.5.3 Sperimentatore principale di centro collaboratore                                                       | SI <input type="checkbox"/>            | NO <input checked="" type="checkbox"/> |
| D.3.5.4 Centro collaboratore                                                                                    | SI <input type="checkbox"/>            | NO <input checked="" type="checkbox"/> |
| D.3.6 Altri casi                                                                                                | SI <input type="checkbox"/>            | NO <input checked="" type="checkbox"/> |
| D.3.6.1 Se sì, specificare:                                                                                     |                                        |                                        |
| <b>D.4 Informazioni sulla sospensione temporanea della sperimentazione<sup>8</sup></b>                          |                                        |                                        |
| D.4.1 Data della sospensione temporanea:                                                                        |                                        |                                        |
| D.4.2 L'arruolamento è stato interrotto                                                                         | SI <input type="checkbox"/>            | NO <input checked="" type="checkbox"/> |
| D.4.3 Il trattamento è stato interrotto                                                                         | SI <input type="checkbox"/>            | NO <input checked="" type="checkbox"/> |
| D.4.4 Numero dei pazienti in trattamento al momento della sospensione temporanea:                               |                                        |                                        |
| D.4.5 Giustificazione della sospensione temporanea della sperimentazione                                        |                                        |                                        |
| D.4.5.1 Sicurezza                                                                                               | SI <input type="checkbox"/>            | NO <input type="checkbox"/>            |

|                                                                                                                                                                                                                                                                                                                                                                                      |                             |                             |
|--------------------------------------------------------------------------------------------------------------------------------------------------------------------------------------------------------------------------------------------------------------------------------------------------------------------------------------------------------------------------------------|-----------------------------|-----------------------------|
| D.4.5.2 Mancanza di efficacia                                                                                                                                                                                                                                                                                                                                                        | SI <input type="checkbox"/> | NO <input type="checkbox"/> |
| D.4.5.3 Qualità dell'IMP                                                                                                                                                                                                                                                                                                                                                             | SI <input type="checkbox"/> | NO <input type="checkbox"/> |
| D.4.5.4 Altro, specificare:                                                                                                                                                                                                                                                                                                                                                          |                             |                             |
| D.4.6 Descrivere brevemente (testo libero)                                                                                                                                                                                                                                                                                                                                           |                             |                             |
| <ul style="list-style-type: none"> <li>Giustificazione della sospensione temporanea:</li> <li>Trattamento proposto per i pazienti in terapia al momento della sospensione temporanea della sperimentazione:</li> <li>Valutazione delle conseguenze della sospensione temporanea sull'interpretazione dei risultati e sul rapporto rischio/beneficio complessivo dell'IMP:</li> </ul> |                             |                             |

Notes:

3=Le informazioni relative ai soggetti partecipanti alla sperimentazione sono oggetto di valutazione del solo comitato etico e non vanno trasmesse all'AIFA.  
4= Si veda la sezione 3.9 della linea guida CT-1.  
5= Si veda la sezione 3.10 della linea guida CT-1.  
6= Si veda la sezione 3.10 della linea guida CT-1.  
7=Le informazioni relative allo sperimentatore, al centro clinico e alle questioni finanziarie sono oggetto di valutazione del comitato etico e non vanno trasmesse all'AIFA; l'aggiunta di un centro / sperimentatore è considerata un emendamento sostanziale solo se la sperimentazione è stata precedentemente approvata dal comitato etico per un altro centro clinico.  
8= Si veda la sezione 3.10 della linea guida CT-1.

E. DESCRIZIONE DI CIASCUN EMENDAMENTO SOSTANZIALE<sup>9</sup> (testo libero)

**Precedente e nuova formulazione del testo (quest'ultima con le modifiche evidenziate in modalità revisione):**

Background:  
La sindrome nefrosica idiopatica (NS) è caratterizzata da proteinuria e ipoalbuminemia associate a dislipidemia e ipercoagulabilità. I corticosteroidi orali sono alla base della terapia e determinano remissione dalla malattia in circa il 90% dei casi. Comunque, circa l'85% dei pazienti recidivano e molti sviluppano una steroid dipendenza (SDNS) che richiede un utilizzo prolungato di prednisone per il mantenimento della remissione. Le guideline della pratica clinica (KDIGO) suggeriscono di utilizzare basse dosi di cortisone per mantenere la remissione in pazienti con SDNS e Micofenolato Mofetile (MMF) o inibitori delle calcineurine (CNI) come farmaci risparmiatori di steroidi per i bambini che sviluppano eventi avversi. Questi farmaci (steroidi, CNI e MMF) hanno effetti collaterali di rilievo e presentano tossicità. Studi recenti supportano l'uso del Rituximab, un

anticorpo monoclonale (mAb) anti CD-20, nella SDNS, ma i benefici possono essere transitori nelle forme severe che richiedono CNI o MMF in associazione con gli steroidi. Un nuovo mAb, Ofatumumab, completamente umanizzato con una maggior capacità di eliminare cellule B, può essere migliore del Rituximab in queste forme di SDNS.

Disegno dello studio:  
Trials clinico randomizzato, controllato, in aperto, con due bracci paralleli, che si propone di testare l'efficacia della terapia con Ofatumumab verso MMF nel mantenimento della remissione di malattia, in pazienti affetti da SN steroido dipendenti. I pazienti arruolabili entreranno in un periodo di run-in di 45 giorni, durante il quale si provvederà a:  
-fornire accurate indicazioni sull'esecuzione della raccolta urine e della lettura degli stick urinari;  
-testare la compliance dei pazienti e delle loro famiglie;  
-iniziare, nel caso in cui non lo siano già assumendo, MMF 1,200 mg/1,73 sqm e progressiva diminuzione dello steroide dopo 15 giorni di 0,3 mg/kg per settimana sino alla sospensione. Pazienti già in terapia con MMF continueranno la loro terapia. Al termine del periodo di run-in, i pazienti verranno randomizzati nel braccio di intervento (Ofatumumab) o in quello di confronto (MMF). L'assegnazione al due bracci dello studio verrà stratificata in base all'età d'insorgenza di malattia (>= 9 e < 9 anni) per massimizzare la probabilità di bilanciare quei fattori che potenzialmente potrebbero influenzare gli effetti del trattamento sull'outcome clinico e che sono associati con l'età (durata di malattia, età all'esordio, numero di recidive e severità di malattia). Dopo l'infusione del farmaco del braccio di intervento, la terapia con MMF steroidea verrà mantenuta alla dose di partenza per 30 giorni e in seguito ridotta del 50% e sospesa dopo altre due settimane.

Tutti i pazienti saranno seguiti al follow up per 24 mesi.  
Terapia di salvataggio: In caso di recidive (definite come un rapporto proteinuria/creatininuria - urinary Proteinuria Creatininuria Ratio, uPCR- >=2000 mg/g - >=200 mg/mmol- o come la presenza di positività dello stick urinario >= 3+ per 3 giorni consecutivi) durante lo studio, i pazienti verranno trattati con prednisone per os al dosaggio di 60 mg/m<sup>2</sup> per ottenere una remissione di malattia. All'avvenuta remissione i pazienti verranno trattati con un'altra infusione di Ofatumumab, se appartenenti al braccio interventistico in base alla randomizzazione iniziale. Dopo la seconda o successiva infusione, la terapia steroidea verrà mantenuta alla dose di partenza per 7 giorni e in seguito ridotta di 0,3 mg/kg/settimana, fino alla completa sospensione. Pazienti non responsivi allo steroide con successive recidive di saranno esclusi dallo studio. Lo studio consente il passaggio da un braccio all'altro dopo tre recidive.

Obiettivi:  
Primario: testare se Ofatumumab sia superiore a MMF nel mantenimento di una remissione di malattia (completa o parziale) senza l'utilizzo di farmaci per os a 12 mesi nei bambini affetti da INS dipendente da terapia steroidea.  
Secondario: testare se Ofatumumab sia superiore a MMF nella riduzione del rischio di recidiva in un periodo di follow up di 24 mesi nei bambini affetti da INS dipendente da terapia steroidea.  
L'occorrenza di effetti collaterali (es. eventi avversi derivanti dall'utilizzo del farmaco in acuto e a lungo termine) e l'analisi del pattern dei linfociti B e T pre e post terapia con Ofatumumab costituiscono degli ulteriori obiettivi di questo studio.

Endpoint:  
L'endpoint primario sarà il rischio di recidiva a 12 mesi, senza la somministrazione di steroide. La recidiva è definita come un rapporto proteinuria/creatininuria (urinary Proteinuria Creatininuria Ratio, uPCR) >=2000 mg/g (>=200 mg/mmol) o come la presenza di positività dello stick urinario >= 3+ per 3 giorni consecutivi. (KDIGO Clinical Practice Guideline for Glomerulonephritis, Kidney International Supplement, 2012 2, 163-171).  
La remissione completa è definita da un rapporto proteinuria/creatininuria (uPCR) <200 mg/g (<20mg/mmol) per 3 giorni consecutivi (KDIGO Clinical Practice Guideline for Glomerulonephritis, Kidney International Supplement, 2012 2, 163-171).

Un altro endpoint secondario sarà la valutazione delle popolazioni cellulari circolanti come biomarkers o predittori della risposta al trattamento con anti CD20. Gli endpoints di sicurezza saranno costituiti dalla frequenza e dalla severità di eventuali eventi avversi e dalle alterazioni dei controlli ematochimici.

Materiali e Metodi:  
1- Criteri di Inclusion:  
Per poter essere arruolabili nello studio, i pazienti dovranno soddisfare i seguenti criteri:  
-Età compresa tra 3 e 24 anni  
- Sindrome nefrosica steroide dipendente 0.3-1 mg/kg/die e assunzione di terapia steroidea per almeno sei mesi precedent all'arruolamento.  
La corticodipendenza è definita come la presenza di due recidive consecutive in corso di terapia steroidea o entro 14 giorni dalla sua sospensione.  
-Capacità di fornire un consenso/assenso: Il consenso informato del genitore/tutore e l'assenso del bambino devono essere ottenuti prima di intraprendere qualsiasi procedura dello studio che non sia parte della normale assistenza del paziente e con la consapevolezza che tale consenso possa essere ritirato in qualsiasi momento, senza che ciò comporti un pregiudizio in merito al trattamento futuro del soggetto  
2-Criteri di esclusione:  
I pazienti saranno esclusi dallo studio nel caso si verifichi uno dei seguenti criteri:  
-Positività a test autoimmuni (ANA, ds DNA, ANCA)  
-Riduzione dei livelli plasmatici della componente C3 del complemento.  
-Filtrato glomerulare (estimated glomerular filtration rate, eGFR) < 90 ml/min/1.73 m<sup>2</sup> calcolato secondo la Formula di Schwartz per i pazienti di età compresa tra 2 e 17 anni e secondo l'equazione CKD-EPI Creatinine 2009 per i pazienti di 18 anni.  
-Gravidanza  
-Neoplasie -Infezioni: infezione progressiva o attuale da HBV (con positività per anticorpi anti HBe) o HCV.  
-Conta dei linfociti B CD20 positivi <2,5%  
-Trattamento con Rituximab o ciclofosfamide negli ultimi 6 mesi.  
Trattamento:  
Farmaco e co-intervento:  
-Nome del farmaco: Ofatumumab (anticorpo monoclonale anti-CD20 completamente umanizzato).  
-Materiali: celizrina e metilprednisolone ev, paracetamolo per os somministrati prima dell'infusione di Ofatumumab per ridurre gli effetti collaterali; Ofatumumab ev.  
-Procedure: premedicazione con: metilprednisolone 2mg/kg infuso ev in 30' diluito in 100 ml di soluzione fisiologica (NaCl 0,9%); paracetamolo per os 15 mg/kg; celizrina 0,4 mg/kg ev in infusione lenta diluito in 5 ml di soluzione fisiologica (NaCl 0,9%). A seguire infusione di Ofatumumab 1500 mg/1,73 m<sup>2</sup> diluito in 1000 ml di soluzione fisiologica infuso ev ad una velocità iniziale di 12 ml/h per i primi 30', raddoppiabile in seguito ogni 30' fino ad una velocità massima di 200 ml/h.  
Confronto:  
-Nome del farmaco: Micofenolato Mofetile (MMF).  
Follow up:  
Le visite dello studio avverranno all'arruolamento, al tempo zero (inleso come data dell'eventuale infusione), ad un mese dall'infusione ed in seguito ogni 3/6 mesi, salvo complicazioni. Il dosaggio della proteinuria su raccolta urine delle 24 ore al tempo zero (a 6, 12 e 24 mesi verrà effettuata presso il laboratorio centrale del centro, in modo da verificare l'outcome primario e secondario. Lo stick per la proteinuria verrà effettuato ogni giorno. In caso di positività dello stick, la presenza di proteinuria verrà confermata su raccolta urine delle 24 ore. Ad 1, 3, 6, 12, 18 e 24 mesi di distanza dall'infusione del farmaco verrà eseguito un prelievo per emocromo citometrico con formula leucocitaria, funzione renale, proteine plasmatiche, dosaggio immunoglobuline, lipidogramma (colesterolo e trigliceridi), albumina e sottopopolazioni linfocitarie (con conta dei linfociti B CD20 positivi). I suddetti esami/controlli clinici verranno eseguiti presso il nostro centro, o, in base ad eventuali problemi logistici, presso un centro nefrologico di riferimento della regione di appartenenza. Tali controlli costituirebbero comunque parte

del regolare follow up di pazienti affetti da INS.  
Benefici e rischi potenziali:  
I risultati di questo studio potrebbero influenzare il trattamento dei pazienti affetti da SD-INS. Infatti, in questi pazienti, Ofatumumab potrebbe consentire la sospensione a lungo termine dello steroide, evitando i suoi effetti collaterali. Il miglioramento della qualità di vita, la riduzione del tasso di ospedalizzazione e dell'utilizzo di risorse sanitarie costituiscono un beneficio economico atteso.  
I potenziali rischi di questo trial sono correlati alla soppressione dei linfociti B CD20 positivi.  
Analisi statistica:  
In questo studio arruoleremo 160 pazienti, con un potere pari all'80% di identificare come significativa una riduzione del rischio di recidiva a due anni da 0.5 a 0.25 (hazard ratio 0.5) ad un two-sided p-value dello 0.05. Questo campione tiene conto di una proporzione tra drop-out e drop-in del 5%.  
Useremo metodi statistici standard per riassumere le caratteristiche del campione generale e secondo il braccio di assegnazione, usando analisi statistiche per dati quantitativi e qualitativi, come appropriato. Useremo una regressione logistica per confrontare il rischio di recidiva a 12 mesi con un two-sided P value statisticamente significativo <0.05.  
Conclusioni:  
In questo progetto proponiamo di confrontare Ofatumumab con il MMF che rappresenta lo standard di riferimento per il trattamento della SDNS. Inoltre ci proponiamo di identificare biomarkers di sensibilità all'Ofatumumab per permettere un future approccio personalizzato nella terapia della NS.  
Il risultato di questo studio potrebbe apportare un significativo miglioramento nella gestione delle NS resistenti alla terapia, una malattia per cui non esiste una terapia efficace ad oggi, potrebbe inoltre apportare un miglioramento della qualità della vita dei pazienti e delle loro famiglie e ridurre il numero di ospedalizzazioni e potrebbe inoltre ridurre l'utilizzo di risorse del sistema sanitario nazionale

Background:  
La sindrome nefrosica idiopatica (NS) è caratterizzata da proteinuria e ipoalbuminemia associate a dislipidemia e ipercoagulabilità. I cortisonici orali sono alla base della terapia e determinano remissione dalla malattia in circa il 90% dei casi. Comunque, circa l'85% dei pazienti recidivano e molti sviluppano una steroid dipendenza (SDNS) che richiede un utilizzo prolungato di prednisone per il mantenimento della remissione. Le guidelines della pratica clinica (KDIGO) suggeriscono di utilizzare basse dosi di cortisone per mantenere la remissione in pazienti con SDNS e Micolofolato Mofetile (MMF) o inibitori delle calcineurine (CNI) come farmaci risparmiatori di steroidi per i bambini che sviluppano eventi avversi. Questi farmaci (steroidi, CNI e MMF) hanno effetti collaterali di rilievo e presentano tossicità. Studi recenti supportano l'uso del Rituximab (RTX), un anticorpo monoclonale (mAb) anti CD-20, nella SDNS, inoltre, dal giugno 2018 è disponibile un nuovo farmaco RTX biosimilare che consente di ridurre i costi del trattamento, ma i benefici possono essere trasferiti nelle forme severe che richiedono CNI e MMF in associazione con gli steroidi. Un nuovo mAb, Ofatumumab, completamente umanizzato con una maggior capacità di eliminare cellule B, può essere migliore del rituximab in queste forme di SDNS.

Disegno dello studio:  
Trial clinico randomizzato, controllato, in aperto, con due bracci paralleli, che si propone di testare l'efficacia della terapia con Ofatumumab-RTX verso MMF nel mantenimento della remissione di malattia, in pazienti affetti da SN Steroide dipendenti.  
I pazienti arruolabili entreranno in un periodo di run-in di 45 giorni, durante il quale si provvederà a:  
-fornire accurate indicazioni sull'esecuzione della raccolta urine e della lettura degli stick urinari;  
-testare la compliance dei pazienti e delle loro famiglie;

-Iniziare, nel caso in cui non lo siano già assumendo, MMF 1,200 mg/1,73 sqm e progressiva diminuzione dello steroide dopo 15 giorni di 0.3 mg/kg per settimana sino alla sospensione. Pazienti già in terapia con MMF continueranno la loro terapia.  
Al termine del periodo di run-in, i pazienti verranno randomizzati nel braccio di intervento (Ofatumumab-RTX) o in quello di confronto (MMF). L'assegnazione ai due bracci dello studio verrà stratificata in base all'età d'insorgenza di malattia (>= 9 e < 9 anni) per massimizzare la probabilità di bilanciare quei fattori che potenzialmente potrebbero influenzare gli effetti del trattamento sull'outcome clinico e che sono associati con l'età (durata di malattia, età all'esordio, numero di recidive e severità di malattia).  
Dopo l'iniezione del farmaco del braccio di intervento, la terapia con MMF steroidea verrà mantenuta alla dose di partenza per 30 giorni e in seguito ridotta del 50% e sospesa dopo altre due settimane.  
Tutti i pazienti saranno seguiti al follow up per 24 mesi.  
Terapia di salvaggio: In caso di recidive (definite come un rapporto proteinuria/creatininuria - urinary Proteinuria/Creatininuria Ratio, uPCR - >2000 mg/g - >200 mg/mmol - o come la presenza di positività dello stick urinario >= 3+ per 3 giorni consecutivi) durante lo studio, i pazienti verranno trattati con prednisone per os al dosaggio di 60 mg/m2 per ottenere una remissione di malattia. All'avvenuta remissione i pazienti verranno trattati con un'altra infusione di Ofatumumab-RTX, se appartenenti al braccio interventistico in base alla randomizzazione iniziale. Dopo la seconda o successiva infusione, la terapia steroidea verrà mantenuta alla dose di partenza per 7 giorni e in seguito ridotta di 0,3 mg/kg/settimana, fino alla completa sospensione. Pazienti non responsivi allo steroide con successive recidive di saranno esclusi dallo studio. Lo studio consente il passaggio da un braccio all'altro dopo tre recidive.  
Obiettivi:  
Primario: testare consigliare che RTX+Ofatumumab sia superiore a MMF nel mantenimento di una remissione di malattia (completa o parziale) senza l'utilizzo di farmaci per os a 12 mesi nei bambini affetti da INS dipendente da terapia steroidea.  
Secondario: testare se Ofatumumab-RTX sia superiore a MMF nella riduzione del rischio di recidiva in un periodo di follow up di 24 mesi nei bambini affetti da INS dipendente da terapia steroidea.  
Terziario: comparare il costo tra MMF e RTX biosimilare.  
L'occorrenza di effetti collaterali (es. eventi avversi derivanti dall'utilizzo del farmaco in acuto e a lungo termine) e l'analisi del pattern dei linfociti B e T pre e post terapia con Ofatumumab-RTX costituiscono degli ulteriori obiettivi di questo studio.  
Endpoints:  
L'endpoint primario sarà il rischio di recidiva a 12 mesi, senza la somministrazione di steroide. La recidiva è definita come un rapporto proteinuria/creatininuria (urinary Proteinuria/Creatininuria Ratio, uPCR) >2000 mg/g (>200 mg/mmol) o come la presenza di positività dello stick urinario >= 3+ per 3 giorni consecutivi. (KDIGO Clinical Practice Guideline for Glomerulonephritis, Kidney International Supplement, 2012 2, 163-171).  
La remissione completa è definita da un rapporto proteinuria/creatininuria (uPCR) <200 mg/g (<20mg/mmol) per 3 giorni consecutivi (KDIGO Clinical Practice Guideline for Glomerulonephritis, Kidney International Supplement, 2012 2, 163-171).  
Un altro endpoint secondario sarà la valutazione delle popolazioni cellulari circolanti come biomarkers o predittori della risposta al trattamento con anti CD20. Gli endpoints di sicurezza saranno costituiti dalla frequenza e dalla severità di eventuali eventi avversi e dalle alterazioni dei controlli ematochimici.  
Materiali e Metodi:  
1- Criteri di Inclusion:  
Per poter essere arruolabili nello studio, i pazienti dovranno soddisfare i seguenti criteri:  
-Età compresa tra 3 e 24 anni  
- Sindrome nefrosica steroide dipendente 0.3-1 mg/kg/die e assunzione di terapia steroidea per almeno sei mesi precedent all'arruolamento.  
La corticodipendenza è definita come la presenza di due recidive consecutive in corso di

terapia steroidea o entro 14 giorni dalla sua sospensione.  
Capacità di fornire un consenso/assenso: il consenso informato del genitore/tutore e l'assenso del bambino devono essere ottenuti prima di intraprendere qualsiasi procedura dello studio che non sia parte della normale assistenza del paziente e con la consapevolezza che tale consenso possa essere ritirato in qualsiasi momento, senza che ciò comporti un pregiudizio in merito al trattamento futuro del soggetto  
2-Criteri di esclusione:  
I pazienti saranno esclusi dallo studio nel caso si verifichi uno dei seguenti criteri:  
-Positività a test autoimmuni (ANA, ds DNA, ANCA)  
-Riduzione dei livelli plasmatici della componente C3 del complemento.  
-Filtrato glomerulare (estimated glomerular filtration rate, eGFR) < 90 ml/min/1.73 m2 calcolato secondo la Formula di Schwartz per i pazienti di età compresa tra 2 e 17 anni e secondo l'equazione CKD-EPI Creatinina 2009 per i pazienti di 18 anni.  
-Gravidanza  
-Neoplasie -Infezioni: infezione pregressa o attuale da HBV (con positività per anticorpi anti HBe) o HCV.  
-Conta dei linfociti B CD20 positivi <2,5%  
-Trattamento con Rituximab o ciclofosfamide negli ultimi 6 mesi.  
Trattamento:  
Farmaco e co-intervento:  
-Nome del farmaco: Ofatumumab-Rituximab biosimilare (anticorpo monoclonale anti-CD20 completamente umanizzato biosimilare).  
-Materiali: cetrizina e metilprednisolone ev, paracetamolo per os somministrati prima dell'infusione di Ofatumumab per ridurre gli effetti collaterali; Ofatumumab ev.  
-Procedure: premedicazione con: metilprednisolone 2mg/kg infuso ev in 30' diluito in 100 ml di soluzione fisiologica (NaCl 0,9%); paracetamolo per os 15 mg/kg; cetrizina 0,4 mg/kg ev in infusione lenta diluito in 5 ml di soluzione fisiologica (NaCl 0,9%). A seguire infusione di RTX ev dosaggio tra 100 e 250 mg Rituximab verrà diluito in 100 ml di salina e somministrato a 2 ml/h per i primi 30'; 3 ml/h per i secondi 30'; 6 ml/h per i terzi 30'; 15 ml/h fino alla fine. Per dosaggi tra 1250 e 500 mg Rituximab verrà diluito in 250 ml di salina e somministrato a 6 ml/h per i primi 30'; 9 ml/h per i secondi 30'; 18 ml/h per i terzi 30'; 36 ml/h fino alla fine. Per dosaggi tra 510 e 1000 mg Rituximab sarà diluito in 500 ml di salina e somministrato a 9 ml/h per i primi 30', successivamente l'infusione può essere raddoppiata ogni 30 minuti fino ad un massimo di 72 ml/h. Ofatumumab 1500 mg/1,73 m2 diluito in 1600 ml di soluzione fisiologica infuso ev ad una velocità iniziale di 12 ml/h per i primi 30', raddoppiabile in seguito ogni 30' fino ad una velocità massima di 200 ml/h.  
Confronto:  
-Nome del farmaco: Micolofolato Mofetile (MMF).  
Follow up:  
Le visite dello studio avverranno all'arruolamento, al tempo zero (inteso come data dell'eventuale infusione), ad un mese dall'infusione ed in seguito ogni 3/6 mesi, salvo complicazioni. Il dosaggio della proteinuria su raccolta urine delle 24 ore al tempo zero e a 6, 12 e 24 mesi verrà effettuata presso il laboratorio centrale del centro, in modo da verificare l'outcome primario e secondario. Lo stick per la proteinuria verrà effettuato ogni giorno. In caso di positività dello stick, la presenza di proteinuria verrà confermata su raccolta urine delle 24 ore. Ad 1, 3, 6, 12, 18 e 24 mesi di distanza dall'infusione del farmaco verrà eseguito un prelievo per emocromo cromatico con formula leucocitaria, funzione renale, proteine plasmatiche, dosaggio immunoglobuline, lipidogramma (colesterolo e trigliceridi), albumina e sottopopolazioni linfocitarie (con conta dei linfociti B CD20 positivi). I suddetti esami/controlli clinici verranno eseguiti presso il nostro centro, o, in base ad eventuali problemi logistici, presso un centro nefrologico di riferimento della regione di appartenenza. Tali controlli costituiranno comunque parte del regolare follow up di pazienti affetti da INS.  
Benefici e rischi potenziali:  
I risultati di questo studio potrebbero influenzare il trattamento dei pazienti affetti da SD-INS. Infatti, in questi pazienti, Ofatumumab-RTX potrebbe consentire la sospensione

a lungo termine dello steroide, evitando i suoi effetti collaterali. Il miglioramento della qualità di vita, la riduzione del tasso di ospedalizzazione e dell'utilizzo di risorse sanitarie costituiscono un beneficio economico atteso.  
I potenziali rischi di questo trial sono correlati alla soppressione dei linfociti B CD20 positivi.  
Analisi statistica:  
In questo studio arruoleremo 160 pazienti, con un potere pari all'80% di identificare come significativa una riduzione del rischio di recidiva a due anni da 0.5 a 0.25 (hazard ratio 0.5) ad un two-sided p-value dello 0.05. Questo campione tiene conto di una proporzione tra drop-out e drop-in del 5%.  
Useremo metodi statistici standard per riassumere le caratteristiche del campione generale e secondo il braccio di assegnazione, usando analisi statistiche per dati quantitativi e qualitativi, come appropriato. Useremo una regressione logistica per confrontare il rischio di recidiva a 12 mesi con un two-sided P value statisticamente significativo <0.05.  
Conclusioni:  
In questo progetto proponiamo di confrontare Ofatumumab-RTX con il MMF che rappresenta lo standard di riferimento per il trattamento della SDNS. Inoltre ci proponiamo di identificare biomarkers di sensibilità all'Ofatumumab per permettere un future approccio personalizzato nella terapia della NS.  
Il risultato di questo studio potrebbe apportare un significativo miglioramento nella gestione delle NS resistenti alla terapia, una malattia per cui non esiste una terapia efficace ad oggi, potrebbe inoltre apportare un miglioramento della qualità della vita dei pazienti e delle loro famiglie e ridurre il numero di ospedalizzazioni e potrebbe inoltre ridurre l'utilizzo di risorse del sistema sanitario nazionale

Nuova formulazione del testo:  
Background:  
La sindrome nefrosica idiopatica (NS) è caratterizzata da proteinuria e ipoalbuminemia associate a dislipidemia e ipercoagulabilità. I cortisonici orali sono alla base della terapia e determinano remissione dalla malattia in circa il 90% dei casi. Comunque, circa l'85% dei pazienti recidivano e molti sviluppano una steroid dipendenza (SDNS) che richiede un utilizzo prolungato di prednisone per il mantenimento della remissione. Le guidelines della pratica clinica (KDIGO) suggeriscono di utilizzare basse dosi di cortisone per mantenere la remissione in pazienti con SDNS e Micolofolato Mofetile (MMF) o inibitori delle calcineurine (CNI) come farmaci risparmiatori di steroidi per i bambini che sviluppano eventi avversi. Questi farmaci (steroidi, CNI e MMF) hanno effetti collaterali di rilievo e presentano tossicità. Studi recenti supportano l'uso del Rituximab (RTX), un anticorpo monoclonale (mAb) anti CD-20 nella SDNS, inoltre, dal giugno 2018 è disponibile un nuovo farmaco RTX biosimilare che consente di ridurre i costi del trattamento. Disegno dello studio:  
Trial clinico randomizzato, controllato, in aperto, con due bracci paralleli, che si propone di testare l'efficacia della terapia con RTX verso MMF nel mantenimento della remissione di malattia, in pazienti affetti da SN Steroide dipendenti.  
I pazienti arruolabili entreranno in un periodo di run-in di 45 giorni, durante il quale si provvederà a:  
-fornire accurate indicazioni sull'esecuzione della raccolta urine e della lettura degli stick urinari;  
-testare la compliance dei pazienti e delle loro famiglie;  
-Iniziare, nel caso in cui non lo siano già assumendo, MMF 1,200 mg/1,73 sqm e progressiva diminuzione dello steroide dopo 15 giorni di 0.3 mg/kg per settimana sino alla sospensione. Pazienti già in terapia con MMF continueranno la loro terapia.  
Al termine del periodo di run-in, i pazienti verranno randomizzati nel braccio di intervento (RTX) o in quello di confronto (MMF). L'assegnazione ai due bracci dello studio verrà stratificata in base all'età d'insorgenza di malattia (>= 9 e < 9 anni) per massimizzare la probabilità di bilanciare quei fattori che potenzialmente potrebbero influenzare gli effetti del trattamento sull'outcome clinico e che sono associati con l'età



(durata di malattia, età all'esordio, numero di recidive e severità di malattia). Dopo l'infusione del farmaco del braccio di intervento, la terapia con MMF steroidea verrà mantenuta alla dose di partenza per 30 giorni e in seguito ridotta del 50% e sospesa dopo altre due settimane.

Tutti i pazienti saranno seguiti al follow up per 24 mesi.

Terapia di salvataggio: in caso di recidive (definite come un rapporto proteinuria/creatininuria -urinary Proteinuria Creatininuria Ratio, uPCR-  $\geq 2000$  mg/g -  $\geq 200$  mg/mmol- o come la presenza di positività dello stick urinario  $\geq 3+$  per 3 giorni consecutivi) durante lo studio, i pazienti verranno trattati con prednisone per os al dosaggio di 60 mg/m2 per ottenere una remissione di malattia. All'avvenuta remissione i pazienti verranno trattati con un'altra infusione di RTX, se appartenenti al braccio interventistico in base alla randomizzazione iniziale. Dopo la seconda o successiva infusione, la terapia steroidea verrà mantenuta alla dose di partenza per 7 giorni e in seguito ridotta di 0,3 mg/kg/settimana, fino alla completa sospensione.

Pazienti non responsivi allo steroide con successive recidive di saranno esclusi dallo studio. Lo studio consente il passaggio da un braccio all'altro dopo tre recidive.

**Obiettivi:**

Primario: consolidare che RTX sia superiore a MMF nel mantenimento di una remissione di malattia (completa o parziale) senza l'utilizzo di farmaci per os a 12 mesi nei bambini affetti da INS dipendente da terapia steroidea.

Secondario: testare se RTX sia superiore a MMF nella riduzione del rischio di recidiva in un periodo di follow up di 24 mesi nei bambini affetti da INS dipendente da terapia steroidea.

Terziario: comparare il costo tra MMF e RTX biosimilare.

L'occorrenza di effetti collaterali (es. eventi avversi derivanti dall'utilizzo del farmaco in acuto e a lungo termine) e l'analisi del pattern del linfociti B e T pre e post terapia con RTX costituiscono degli ulteriori obiettivi di questo studio.

**Endpoints:**

L'endpoint primario sarà il rischio di recidiva a 12 mesi, senza la somministrazione di steroide. La recidiva è definita come un rapporto proteinuria/creatininuria (urinary Proteinuria Creatininuria Ratio, uPCR)  $\geq 2000$  mg/g ( $\geq 200$  mg/mmol) o come la presenza di positività dello stick urinario  $\geq 3+$  per 3 giorni consecutivi. (KDIGO Clinical Practice Guideline for Glomerulonephritis, Kidney International Supplement, 2012 2, 163-171).

La remissione completa è definita da un rapporto proteinuria/creatininuria (uPCR)  $< 200$  mg/g ( $< 20$  mg/mmol) per 3 giorni consecutivi (KDIGO Clinical Practice Guideline for Glomerulonephritis, Kidney International Supplement, 2012 2, 163-171).

Un altro endpoint secondario sarà la valutazione delle popolazioni cellulari circolanti come biomarkers o predittori della risposta al trattamento con anti CD20. Gli endpoints di sicurezza saranno costituiti dalla frequenza e dalla severità di eventuali eventi avversi e dalle alterazioni dei controlli ematocimici.

**Materiali e Metodi:**

**1- Criteri di inclusione:**

Per poter essere arruolabili nello studio, i pazienti dovranno soddisfare i seguenti criteri:

- Età compresa tra 3 e 24 anni
- Sindrome nefrosica steroide dipendente 0.3-1 mg/kg/die e assunzione di terapia steroidea per almeno sei mesi precedenti all'arruolamento.
- La corticoidipendenza è definita come la presenza di due recidive consecutive in corso di terapia steroidea o entro 14 giorni dalla sua sospensione.
- Capacità di fornire un consenso/assenso: il consenso informato del genitore/tutore e l'assenso del bambino devono essere ottenuti prima di intraprendere qualsiasi procedura dello studio che non sia parte della normale assistenza del paziente e con la consapevolezza che tale consenso possa essere ritirato in qualsiasi momento, senza che ciò comporti un pregiudizio in merito al trattamento futuro del soggetto

**2-Criteri di esclusione:**

**I pazienti saranno esclusi dallo studio nel caso si verifichi uno dei seguenti criteri:**

- Positività a test autoimmuni (ANA, ds DNA, ANCA)
- Riduzione dei livelli plasmatici della componente C3 del complemento.
- Filtrato glomerulare (estimated glomerular filtration rate, eGFR)  $< 90$  ml/min/1.73 m2 calcolato secondo la Formula di Schwartz per i pazienti di età compresa tra 2 e 17 anni e secondo l'equazione CKD-EPI Creatinine 2009 per i pazienti di 18 anni.
- Gravidanza
- Neoplasie -Infezioni: Infezione pregressa o attuale da HBV (con positività per anticorpi anti HBe) o HCV.
- Conta dei linfociti B CD20 positivi  $< 2,5\%$
- Trattamento con Rituximab o ciclofosfamide negli ultimi 6 mesi.

**Trattamento:**

**Farmaco e co-intervento:**

- Nome del farmaco: Rituximab biosimilare (anticorpo monoclonale anti-CD20 chimérico).
- Materiali: cetirizina e metilprednisolone ev, paracetamolo per os somministrati prima dell'infusione di RTX per ridurre gli effetti collaterali; RTX ev.
- Procedura: premedicazione con: metilprednisolone 2mg/kg infuso ev in 30' diluito in 100 ml di soluzione fisiologica (NaCl 0,9%); paracetamolo per os 15 mg/kg; cetirizina 0,4 mg/kg ev in infusione lenta diluito in 5 ml di soluzione fisiologica (NaCl 0,9%).
- A seguire infusione di RTX per dosaggi tra 100 e 250 mg Rituximab verrà diluito in 100 ml di salina e somministrato a 2 ml/h per i primi 30'; 3 ml/h per i secondi 30'; 6 ml/h per i terzi 30'; 15 ml/h fino alla fine. Per dosaggi tra 1260 e 500 mg Rituximab verrà diluito in 250 ml di salina e somministrato a 6 ml/h per i primi 30'; 9 ml/h per i secondi 30'; 18 ml/h per i terzi 30'; 36 ml/h fino alla fine. Per dosaggi tra 510 e 1000 mg Rituximab sarà diluito in 500 ml di salina e somministrato a 9 ml/h per i primi 30', successivamente l'infusione può essere raddoppiata ogni 30 minuti fino ad un massimo di 72 ml/h. Confronto:
- Nome del farmaco: Micofenolato Mofetile (MMF).

**Follow up:**

Le visite dello studio avverranno all'arruolamento, al tempo zero (Inteso come data dell'eventuale infusione), ad un mese dall'infusione ed in seguito ogni 3/6 mesi, salvo complicazioni. Il dosaggio della proteinuria su raccolta urine delle 24 ore al tempo zero e a 6, 12 e 24 mesi verrà effettuata presso il laboratorio centrale del centro, in modo da verificare l'esito primario e secondario. Lo stick per la proteinuria verrà effettuato ogni giorno. In caso di positività dello stick, la presenza di proteinuria verrà confermata su raccolta urine delle 24 ore. Ad 1, 3, 6, 12, 18 e 24 mesi di distanza dall'infusione del farmaco verrà eseguito un prelievo per emocromo citometrico con formula leucocitaria, funzione renale, proteine plasmatiche, dosaggio immunoglobuline, lipidogramma (colesterolo e trigliceridi), albumina e sottopopolazioni linfocitarie (con conta dei linfociti B CD20 positivi). I suddetti esami/controlli clinici verranno eseguiti presso il nostro centro, o, in base ad eventuali problemi logistici, presso un centro nefrologico di riferimento della regione di appartenenza. Tali controlli costituirebbero comunque parte del regolare follow up di pazienti affetti da INS.

**Benefici e rischi potenziali:**

I risultati di questo studio potrebbero influenzare il trattamento dei pazienti affetti da SD-INS. Infatti, in questi pazienti, RTX potrebbe consentire la sospensione a lungo termine dello steroide, evitando i suoi effetti collaterali. Il miglioramento della qualità di vita, la riduzione del tasso di ospedalizzazione e dell'utilizzo di risorse sanitarie costituiscono un beneficio economico atteso.

I potenziali rischi di questo trial sono correlati alla soppressione dei linfociti B CD20 positivi.

**Analisi statistica:**

In questo studio arruoleremo 160 pazienti, con un potere pari all'80% di identificare come significativa una riduzione del rischio di recidiva a due anni da 0.5 a 0.25 (hazard ratio 0.5) ad un two-sided p-value dello 0.05. Questo campione tiene conto di una proporzione tra drop-out e drop-in del 5%.

Usaremo metodi statistici standard per riassumere le caratteristiche del campione

generale e secondo il braccio di assegnazione, usando analisi statistiche per dati quantitativi e qualitativi, come appropriato. Useremo una regressione logistica per confrontare il rischio di recidiva a 12 mesi con un two-sided P value statisticamente significativo  $< 0.05$ .

**Conclusioni:**

In questo progetto proponiamo di confrontare RTX con il MMF che rappresenta lo standard di riferimento per il trattamento della SDNS. Inoltre ci proponiamo di identificare biomarkers di sensibilità all'Ofatumumab per permettere un futuro approccio personalizzato nella terapia della NS.

Il risultato di questo studio potrebbe apportare un significativo miglioramento nella gestione delle NS resistenti alla terapia, una malattia per cui non esiste una terapia efficace ad oggi, potrebbe inoltre apportare un miglioramento della qualità della vita dei pazienti e delle loro famiglie e ridurre il numero di ospedalizzazioni e potrebbe inoltre ridurre l'utilizzo di risorse del sistema sanitario nazionale.

**Commenti / spiegazioni / motivazioni dell'emendamento sostanziale:**

La richiesta di emendamento sostanziale riguarda: la modifica del farmaco utilizzato per la sperimentazione della terapia per la sindrome nefrosica steroide dipendente SNSD. Invece dell'anticorpo monoclonale umanizzato anti CD20 Ofatumumab (OFA) si propone l'utilizzo di anticorpo monoclonale chimérico Rituximab biosimilare (RTX). Tale modifica è relativa alle nuove informazioni ottenute dal compimento degli studi comparativi in alto di OFA e RTX che dimostrano (dati confidenziali) la non inferiorità di RTX nella terapia della SNSD e il maggior impatto di side effects all'infusione di OFA (elevata incidenza di fenomeni bronchiolitidi) mentre la tollerabilità a lungo termine di entrambi i farmaci sembra paragonabile; inoltre la recente introduzione sul mercato di un biosimilare del RTX consente una spesa pari ad almeno il 50% in meno rispetto ad OFA ed infine, ma decisivo per il progetto, è che il farmaco OFA è stato ritirato dal commercio da fine 2018. Siamo stati informati da Novartis (attuale proprietaria della linea di produzione di OFA) che è già stata inoltrata ad EMA la richiesta di ritiro di AIC. Non ci è possibile spiegare tale richiesta se non per ragioni di mercato e/o per strategie aziendali (Sandoz produttrice di Rixathon-Rituximab biosimilare: fa parte del gruppo Novartis) ma certamente la decisione non appare ad oggi modificabile. Non ci risultano, peraltro, dati di safety se non quanto riferito sopra riguardo gli episodi bronchiolitidi, che abbiamo consigliato il ritiro di OFA. Vedi protocollo sezione 6.

**Notes:**

9- Si veda la sezione 3.7.c della linea guida CT-1. Il promotore potrebbe presentare questi testi in un documento separato allegandolo alla sezione G.2 del presente modulo.

**F. CAMBIO / AGGIUNTA SPERIMENTATORE / CENTRO CLINICO (ove applicabile, compilare la sezione F1 o F2)**

**F.1 Fornire i dettagli dello sperimentatore coordinatore e del centro clinico**

F.1.1 Nome:

F.1.2 Cognome:

F.1.3 Qualifica:

F.1.4 Indirizzo del centro clinico:

F.1.5 Comitato etico di riferimento:

F.1.6 Nome e cognome del precedente sperimentatore coordinatore:

**F.2 Fornire i dettagli dello sperimentatore principale e del centro clinico collaboratore**

F.2.1 Nome:

F.2.2 Cognome:

F.2.3 Qualifica:

F.2.4 Indirizzo del centro clinico:

F.2.5 Nome e cognome del precedente sperimentatore:

**G. LISTA DEI DOCUMENTI ALLEGATI ALLA DOMANDA DI EMENDAMENTO**

Si prega di presentare soltanto i documenti pertinenti e/o, se del caso, di fare precisi riferimenti ai documenti già presentati.

Fare precisi riferimenti a eventuali modifiche di pagine distinte e presentare i testi vecchi e quelli modificati.

Barrare la/e casella/e appropriata/e.

G.1 Lettera di presentazione

G.2 Estratto dal documento emendato in accordo alla sezione 3.7.c della linea guida CT-1 (se non specificato nella sezione E di questo modulo)

G.3 Nuova versione completa del documento <sup>10</sup>

G.4 Informazioni a supporto

G.5 Se modificati dall'emendamento: file in formato .xml aggiornato creato tramite il sito EudraCT: <https://eudract.ema.europa.eu/> (da inviare solo ad AIFA) e copia dell'Appendice 5 aggiornata, con le modifiche evidenziate (da inviare ad AIFA e al Comitato etico)

G.6 Eventuali commenti su qualsiasi nuovo aspetto dell'emendamento

G.7 Specificare data e versione dei documenti allegati (testo libero):

- Domanda autorizzazione AIFA data 08/02/2019
- Protocollo versione 2 del 8/02/2019
- Sinossi versione 2 del 8/02/2019
- Scheda tecnica Rixathon

- Scheda tecnica Myfenac
  - Benefit and Risk assessment data 08/02/2019
  - Valutazioni etiche data 08/02/2019
  - Elenco centri partecipanti data 05/02/2018
  - Consenso genitore versione 2 del 8/02/2019
  - Consenso maggiorenne versione 2 del 8/02/2019
  - Assenso adolescente versione 2 del 8/02/2019
  - Assenso preadolescente versione 2 del 08/02/2019
  - Lettera medico curante versione 3 del 08/02/2019
  - Consenso dati personali genitore versione 2 del 08/02/2019
  - Consenso dati personali maggiorenne versione 2 del 08/02/2019
  - Assenso dati personali adolescente versione 2 del 08/02/2019
  - Assenso dati personali preadolescente versione 1 del 08/02/2019
  - Consenso materiale biologico genitore versione 2 del 08/02/2019
  - Consenso materiale biologico maggiorenne versione 2 del 08/02/2019
  - Assenso materiale biologico adolescente versione 2 del 08/02/2019
  - Assenso materiale biologico preadolescente versione 2 del 08/02/2019
  - Modulo5 CERLiguria\_Sperim\_NoProfit del 08/02/2019
  - Curriculum vitae breve
  - Modulo 3 CERLiguria\_CINT del 08/02/2019
- G.8 Supporto elettronico contenente copia della documentazione e dell'Appendice 9 x

Note:  
10- Si veda la sezione 3.7.c della linea guida CT-1.

**H. FIRMA DEL RICHIEDENTE**

**H.1 Il sottoscritto attesta / attesta per conto del promotore che:**

- le informazioni contenute nella presente domanda sono esatte;
- la documentazione in allegato su supporto elettronico è completa e conforme alla versione su supporto cartaceo;
- la sperimentazione sarà effettuata in conformità al protocollo, alla normativa vigente ed alle Norme di buona pratica clinica;
- la proposta di emendamento è ragionevole.

**H.2 Richiedente che inoltra la domanda**

H.2.1 Data: 08/02/2019

H.2.2 Firma: 

H.2.3 Nome: Stefania

H.2.4 Cognome: Gamba

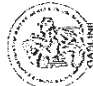

Istituto Giannina Gaslini

**DATI INTEGRATIVI ALLA RICHIESTA DI PARERE**

|                                                                                                                                                                                             |                                                                                                                                                                                                                                            |
|---------------------------------------------------------------------------------------------------------------------------------------------------------------------------------------------|--------------------------------------------------------------------------------------------------------------------------------------------------------------------------------------------------------------------------------------------|
| <b>Codice Protocollo</b>                                                                                                                                                                    | RTX4                                                                                                                                                                                                                                       |
| <b>Titolo (in italiano)</b>                                                                                                                                                                 | Efficacia dell'anticorpo chimerico monoclonale anti-CD20 (Rituximab Biosimilar) nel trattamento della sindrome nefrosica stereoido dipendente e sviluppo di biomarkers predittivi dell'evoluzione della malattia. Il trial RTX4.           |
| <b>Tipologia di studio</b>                                                                                                                                                                  | Osservazionale <input type="checkbox"/> Interventistico con farmaco x<br>Interventistico senza farmaco <input type="checkbox"/> Chirurgico <input type="checkbox"/>                                                                        |
|                                                                                                                                                                                             | Dispositivo <input type="checkbox"/> Tradizionale / Ricerca di base <input type="checkbox"/>                                                                                                                                               |
|                                                                                                                                                                                             | Profit <input type="checkbox"/> No-Profit x                                                                                                                                                                                                |
|                                                                                                                                                                                             | Fase I <input type="checkbox"/> Fase II x Fase III <input type="checkbox"/> Fase IV <input type="checkbox"/>                                                                                                                               |
| <b>SPERIMENTATORE PRINCIPALE</b><br>(indicare Nome Cognome Ente di appartenenza del PI e Unità Operativa)                                                                                   | Gian Marco Ghiggeri,<br>IRCCS G. Gaslini, Genova<br>Dipartimento di Pediatria, U.O.C. di Nefrologia, Dialisi e Trapianto                                                                                                                   |
| <b>n. EudraCT</b><br>(se applicabile)                                                                                                                                                       | 2018-001042-33                                                                                                                                                                                                                             |
| <b>CENTRO COORDINATORE</b><br>(indicare le informazioni utili relative al coordinatore e al relativo centro: Nome, Cognome, Titolo, Telefono, FAX, E-mail del PI, UO, indirizzo del Centro) | Gian Marco Ghiggeri,<br>IRCCS G. Gaslini, Genova<br>Dipartimento di Pediatria, U.O.C. di Nefrologia, Dialisi e Trapianto<br>Via Gaslini, 5<br>16148 Genova<br>Fax : +39010395214<br>Tel: +39010395214<br>Email: GMarcoGhiggeri@gaslini.org |
| <b>PROMOTORE</b>                                                                                                                                                                            | IRCCS G. Gaslini, Genova                                                                                                                                                                                                                   |
| <b>CRO</b>                                                                                                                                                                                  |                                                                                                                                                                                                                                            |
| <b>DATI PER FATTURAZIONE</b><br>(Cognome, nome, numero telefono, email)<br>(se applicabile)                                                                                                 |                                                                                                                                                                                                                                            |

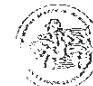

Istituto Giannina Gaslini

Indirizzo per la Fatturazione  
(se applicabile)

|                                                                                                             |                                                                                                                                                                                                                                                                    |      |
|-------------------------------------------------------------------------------------------------------------|--------------------------------------------------------------------------------------------------------------------------------------------------------------------------------------------------------------------------------------------------------------------|------|
| <u>Parere Unico Centro Coordinatore allegato</u>                                                            | SI <input type="checkbox"/>                                                                                                                                                                                                                                        | No x |
| <u>Numero di pazienti previsti per il centro</u>                                                            | 80                                                                                                                                                                                                                                                                 |      |
| <u>Compenso per paziente completato</u>                                                                     |                                                                                                                                                                                                                                                                    |      |
| <u>Data prevista di inizio sperimentazione</u>                                                              | giugno 2019                                                                                                                                                                                                                                                        |      |
| <u>Data prevista di fine sperimentazione al Centro</u><br>(approssimativamente)                             | Giugno 2022                                                                                                                                                                                                                                                        |      |
| <u>Durata della sperimentazione in toto</u><br>(espressa in mesi)                                           | 36 mesi                                                                                                                                                                                                                                                            |      |
| <u>Contatto/</u><br><u>di riferimento per lo studio</u><br>(indicare Nome Cognome cellulare, fisso, e-mail) | Gian Marco Ghiggeri,<br>IRCCS G. Gaslini, Genova<br>Dipartimento di Pediatria, U.O.C. di Nefrologia, Dialisi e Trapianto<br>Via Gaslini, 5<br>16148 Genova<br>Fax : +39010395214<br>Tel: +39010395214<br>Cell: +39 3297576085<br>Email: GMarcoGhiggeri@gaslini.org |      |

Dettagliato elenco dei documenti presentati in formato word (non lista la o lb), comprensivo di date e versioni

- Lettera di trasmissione AIFA data 08/02/2019
- Lettera di trasmissione CER data 08/02/2019
- Dichiarazione no profit data 08/02/2019
- Domanda autorizzazione AIFA data 08/02/2019
- Appendice 9 data 08/02/2019
- Protocollo versione 2 del 8/02/2019
- Sinossi versione 2 del 8/02/2019
- CRF versione 1 data 05/02/2018



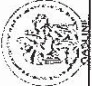

*Istituto Giannina Gaslini*

- Scheda tecnica Rixathon
- Scheda tecnica Myfenac
- Benefit and Risk assessment data 08/02/2019
- Valutazioni etiche data 08/02/2019
- Elenco centri partecipanti data 05/02/2018
- Consenso genitore versione 2 del 8/02/2019
- Consenso maggiorenne versione 2 del 8/02/2019
- Assenso adolescente versione 2 del 8/02/2019
- Assenso preadolescente versione 2 del 08/02/2019
- Lettera medico curante versione 3 del 08/02/2019
- Consenso dati personali genitore versione 2 del 08/02/2019
- Consenso dati personali maggiorenne versione 2 del 08/02/2019
- Assenso dati personali adolescente versione 2 del 08/02/2019
- Assenso dati personali preadolescente versione 1 del 08/02/2019
- Consenso materiale biologico genitore versione 2 del 08/02/2019
- Consenso materiale biologico maggiorenne versione 2 del 08/02/2019
- Assenso materiale biologico adolescente versione 2 del 08/02/2019
- Assenso materiale biologico preadolescente versione 2 del 08/02/2019
- Modulo6 CERLiguria\_Sperim\_NoProfit del 08/02/2019
- Modulo 3 CERLiguria\_CINT del 08/02/2019

Genova, 08/02/2019

Dr. GianMarco Ghiggeri

  
G. Ghiggeri  
U.O. Pediatria  
Istituto Giannina Gaslini
