# Supplementary material
Source: PubMed Central journal article supplement (PMC7900932)
Supplement: jamapediatr-e206150-s002.pdf [file jamapediatr-e206150-s002.pdf]

## Data Sharing Statement

Ravani. Association of Rituximab vs Low-Dose Mycophenolate Mofetil With Recurrence of Steroid-Dependent Nephrotic Syndrome in Children and Young Adults. *JAMA Pediatr*. Published February 22, 2021. doi:10.1001/jamapediatrics.2020.6150

### Data

**Data available:** Yes

**Data types:** Deidentified participant data

**How to access data:** Data will be provided on request to [gmarcoghiggeri@gaslini.org](mailto:gmarcoghiggeri@gaslini.org)

**When available:** With publication

### Supporting Documents

**Document types:** None

### Additional Information

**Who can access the data:** Researchers whose proposed use of the data has been approved.

**Types of analyses:** Any purpose

**Mechanisms of data availability:** With a signed data access agreement
